# Supplementary material for: Bacterial outer membrane vesicles suppress tumor by interferon-γ-mediated antitumor response
Source: PubMed Central journal article supplement (PMC5606984; doi:10.1038/s41467-017-00729-8), 2017-09-20
Supplement: 41467_2017_729_MOESM1_ESM.pdf [file 41467_2017_729_MOESM1_ESM.pdf]

### **Description of Supplementary Files**

File Name: Supplementary Information

Description: Supplementary Figures, Supplementary Tables, Supplementary Methods and Supplementary References

File Name: Peer Review File

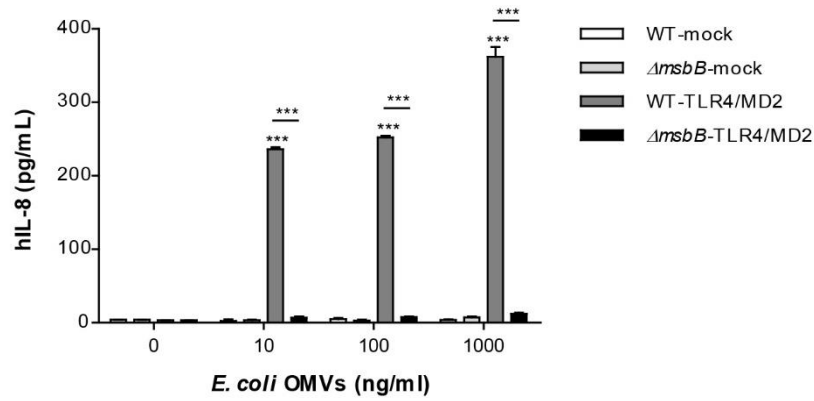

**Supplementary Figure 1. *E. coli msbB* mutant ( $\Delta msbB$ ) OMVs have impaired lipid A function.** Production of human IL-8 cytokines from mock- and TLR4/MD2-transfected human embryonic kidney HEK293 cells after *E. coli* WT and  $\Delta msbB$  OMV-treatments ( $n = 4$ , two independent experiments). Data are presented as the mean  $\pm$  s.d. from a representative experiments. \*\*\* indicates  $P < 0.001$  analysed unpaired Student's t-test.

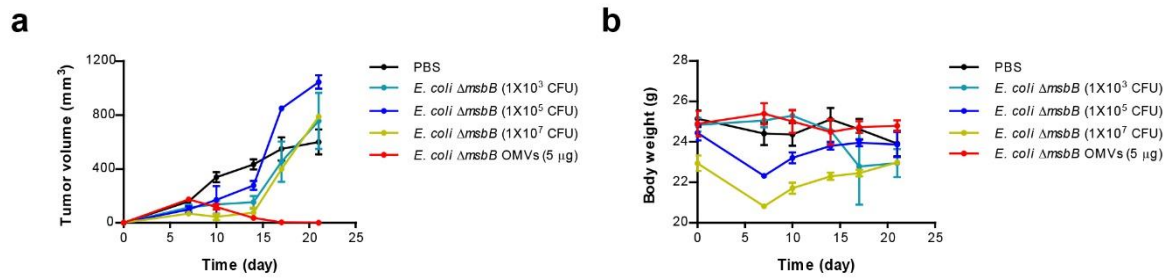

**Supplementary Figure 2. Tumor regression effect of *E. coli*  $\Delta msbB$  mutant bacteria. a,b,** Tumor volume (a) and body weight (b) of mice bearing CT26 tumor measured after treatments of *E. coli*  $\Delta msbB$  mutant bacteria and *E. coli*  $\Delta msbB$  OMVs ( $n = 7$  mice per group). Data are presented as the mean  $\pm$  s.d. from a representative experiments.

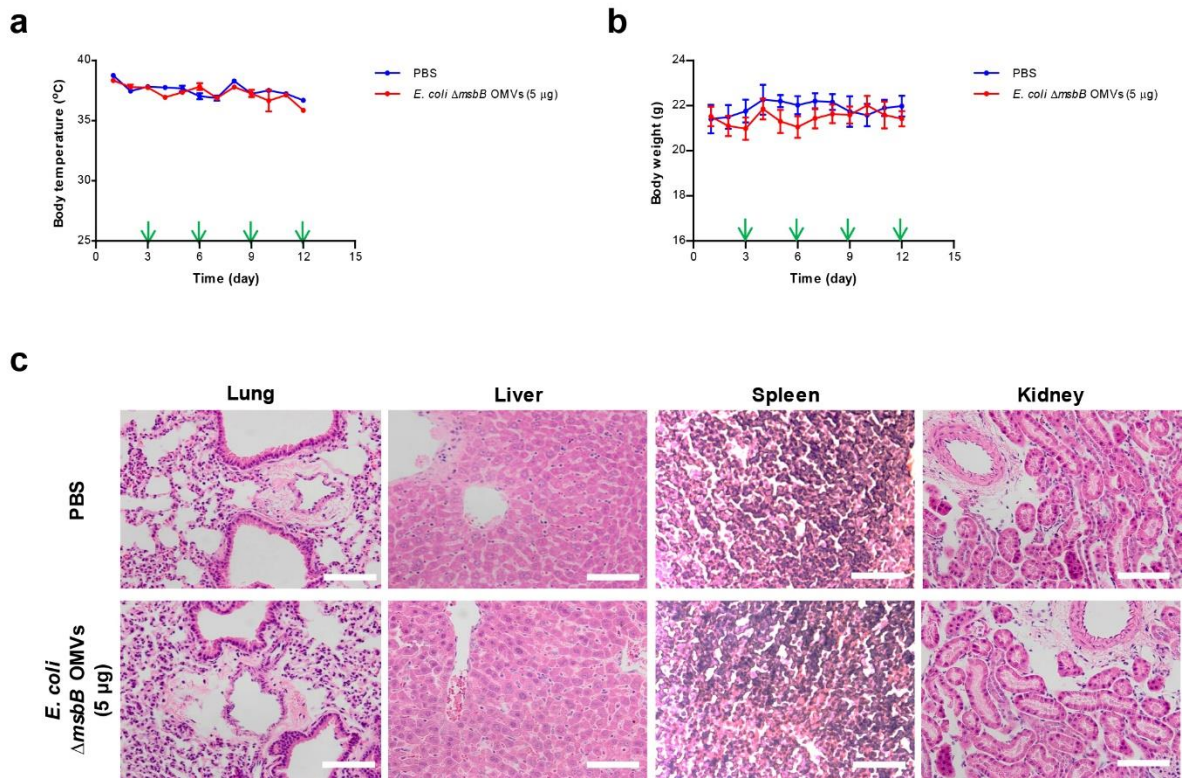

**Supplementary Figure 3. Effect of *E. coli*  $\Delta msbB$  OMV-treatments on body weight and temperature and organ histology. a,b** Body temperature (a) and body weight (b) of mice bearing CT26 tumor measured after intravenous treatments of 5  $\mu$ g *E. coli*  $\Delta msbB$  OMVs ( $n = 7$  mice per group). Green arrows indicate OMV-treatments. Data are presented as the mean  $\pm$  s.d. from a representative experiments. c, Histology of the lung, liver, spleen and kidney extracted from the mice at day 15. Scale bars, 50  $\mu$ m.

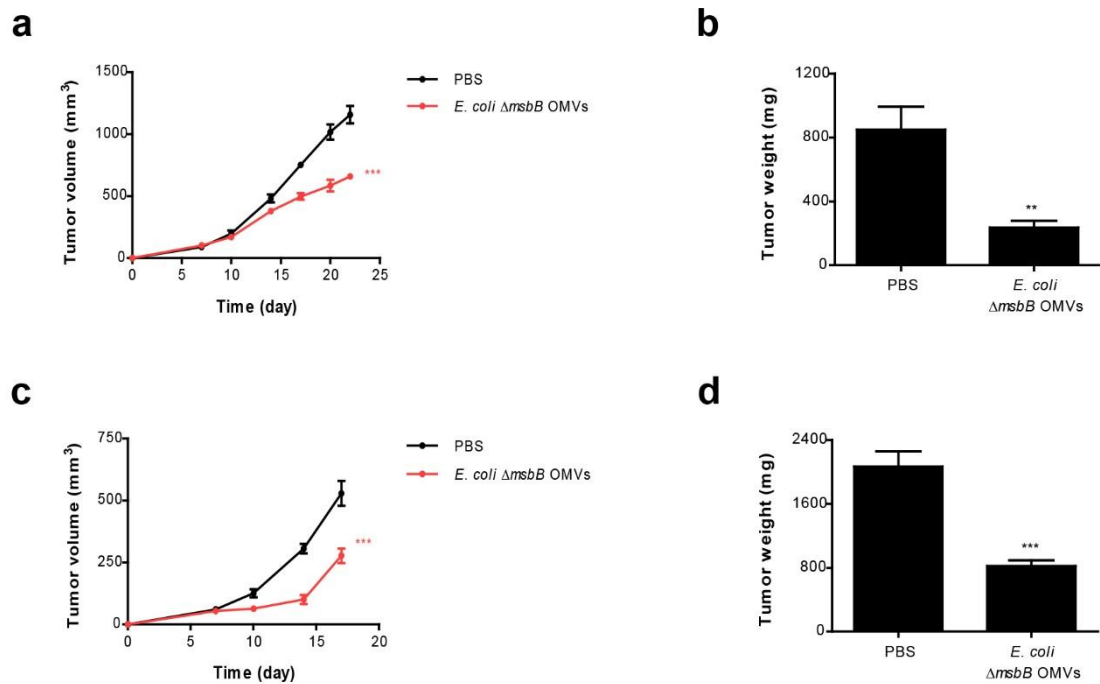

**Supplementary Figure 4. Antitumor activity of *E. coli*  $\Delta msbB$  OMVs on the primary tumor growth of highly metastatic 4T1 carcinoma and B16BL6 melanoma cells.** Highly metastatic 4T1 carcinoma cells and B16BL6 melanoma cells were subcutaneously injected to the right flank of the mice (total  $n = 12$  mice per group, two independent experiments). *E. coli*  $\Delta msbB$  OMVs (5  $\mu$ g) were injected intravenously four times from day 7 with 3 days interval. **a-d**, Primary tumor volume of mice bearing 4T1 (**a**) and B16BL6 (**c**) tumor measured after *E. coli*  $\Delta msbB$  OMV-treatments. Weight of 4T1 (**b**) and B16BL6 (**d**) primary tumor of mice at the end of the experiment. \*\* and \*\*\* indicate  $P < 0.01$  and  $P < 0.001$ , respectively, analysed by two-way ANOVA (**a, c**) and unpaired Student's t-test (**b, d**). Data are presented as the mean  $\pm$  s.d. from a representative experiments.

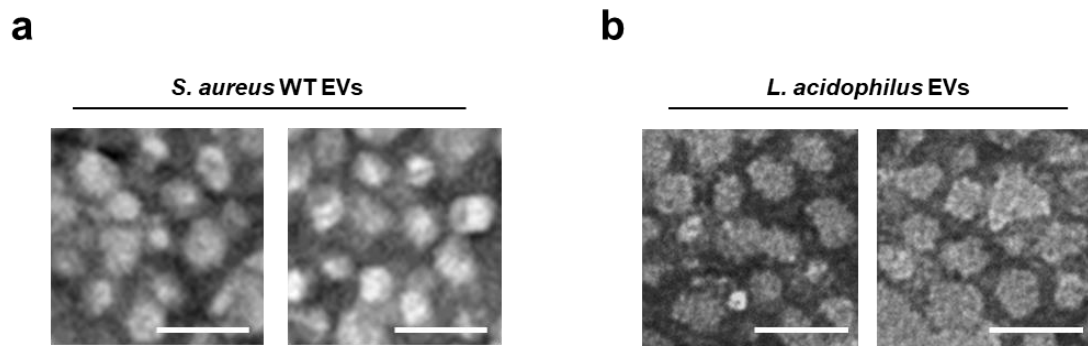

**Supplementary Figure 5. Transmission electron micrograph images of Gram-positive bacterial extracellular vesicles. a,b,** Transmission electron micrograph image of *S. aureus* wildtype (**a**) and *L. acidophilus* (**b**) extracellular vesicles. Scale bars, 50 nm.

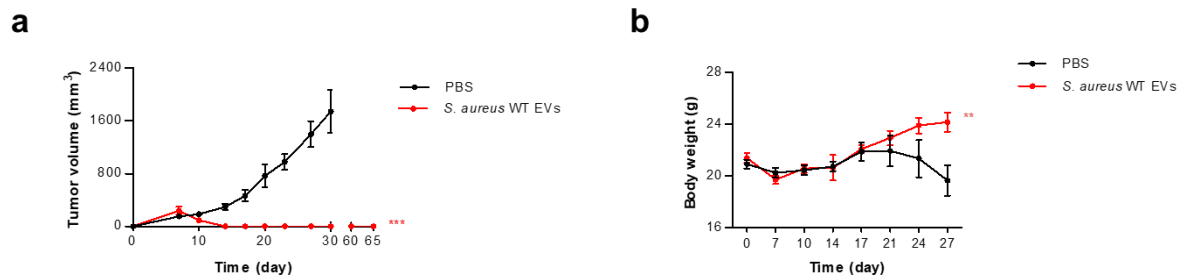

**Supplementary Figure 6. Antitumor activity of Gram-positive *S. aureus* wildtype extracellular vesicles on CT26 tumor cells.** To check if the tumor regression effect is maintained for long-term without tumor rebound, *S. aureus* wildtype extracellular vesicles (EVs) (5  $\mu$ g in total protein amount) were injected intravenously four times from day 7 with 3 days intervals to BALB/c mice subcutaneously injected with CT26 tumor cells (total  $n = 12$  mice per group, two independent experiments). **a**, Tumor volume measured after *S. aureus* extracellular vesicle-treatments. **b**, Body weights of mice measured after different time points after tumor challenge. \*\* and \*\*\* indicate  $P < 0.01$  and  $P < 0.001$ , respectively, analysed by two-way ANOVA. Data are presented as the mean  $\pm$  s.d. from a representative experiments.

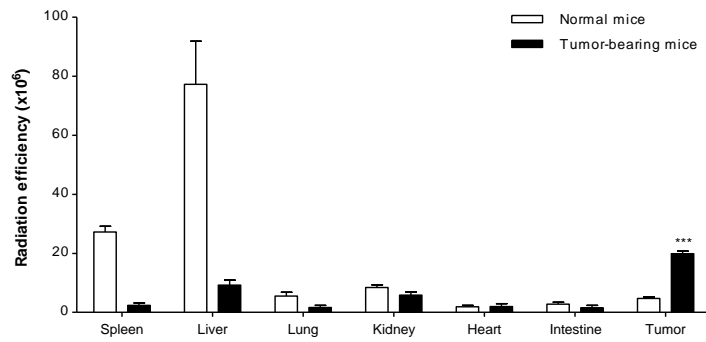

**Supplementary Figure 7. Targeting of *E. coli*  $\Delta msbB$  OMVs to tumor tissues after systemic administration.** Cy7-labeled *E. coli*  $\Delta msbB$  OMVs ( $\Delta msbB$  <sup>Cy7</sup>OMVs) were systematically injected to BALB/c mice bearing CT26 tumor cells. For control,  $\Delta msbB$  <sup>Cy7</sup>OMVs were also injected to healthy BALB/c mice with no tumor. Spleen, liver, kidney, lung, heart, intestine, and tumor tissues were isolated to measure the accumulation of Cy7 fluorescence in different organs. Radiant efficiencies of each organ were acquired for Cy7 fluorescence using Living Image 3.1 Software. Results are from three independent experiments (total  $n = 9$ ). \*\*\* indicates  $P < 0.001$  analysed by unpaired Student's t-test. Data are presented as the mean  $\pm$  s.d. from a representative experiments.



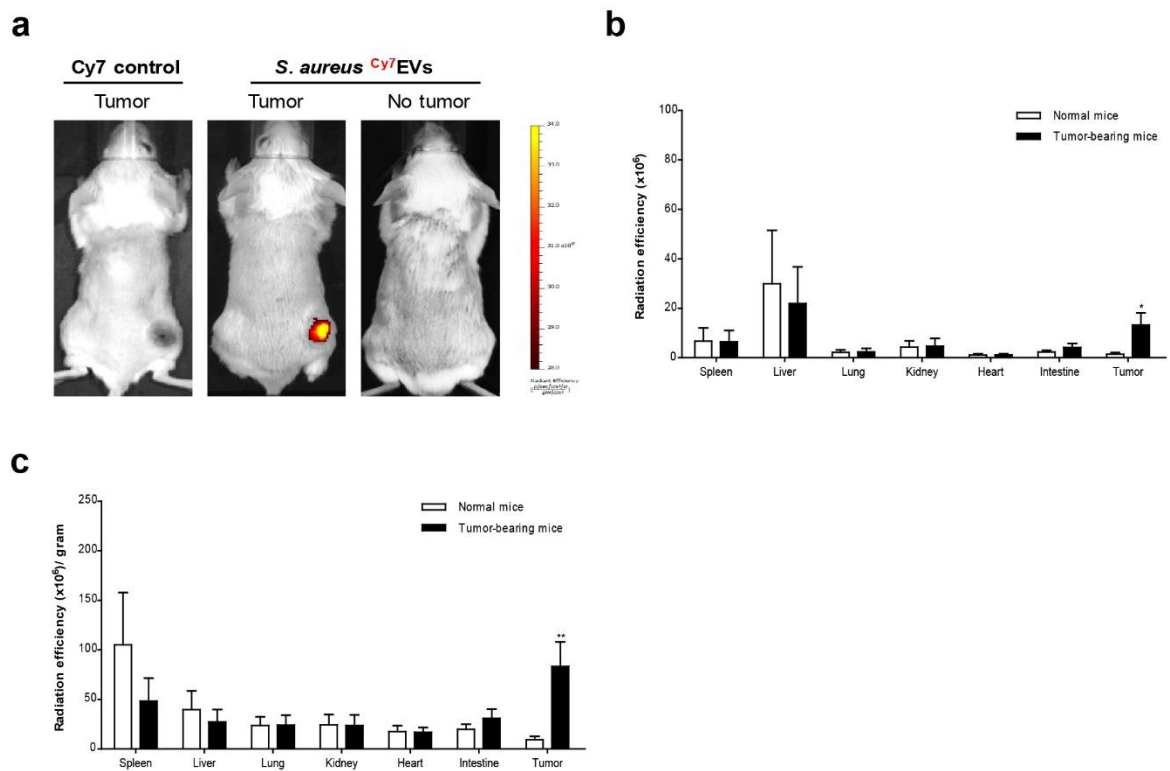

**Supplementary Figure 8. Targeting of *S. aureus* extracellular vesicles to tumor tissues after systemic administration.** **a**, Cy7 control and Cy7-labeled *S. aureus* wildtype extracellular vesicles (*S. aureus* Cy7EVs) were systematically injected to BALB/c mice bearing CT26 tumor cells. For control, *S. aureus* Cy7EVs were also injected to healthy BALB/c mice with no tumor. Whole body distributions of the injected Cy7EVs were observed using *in vivo* imaging system spectrum 12 h after the injection. **b,c**, To measure the accumulation of Cy7 fluorescence in different organs, spleen, liver, kidney, lung, heart, intestine, and tumor tissues were isolated. Radiant efficiencies of each organ were acquired for Cy7 fluorescence using Living Image 3.1 Software (**b**) and were normalized by each organ weight (**c**). Results are from three independent experiments (total n = 9). \*, and \*\* indicate  $P < 0.05$  and  $P < 0.01$ , respectively, analysed by unpaired Student's t-test. Data are presented as the mean  $\pm$  s.d. from a representative experiments.

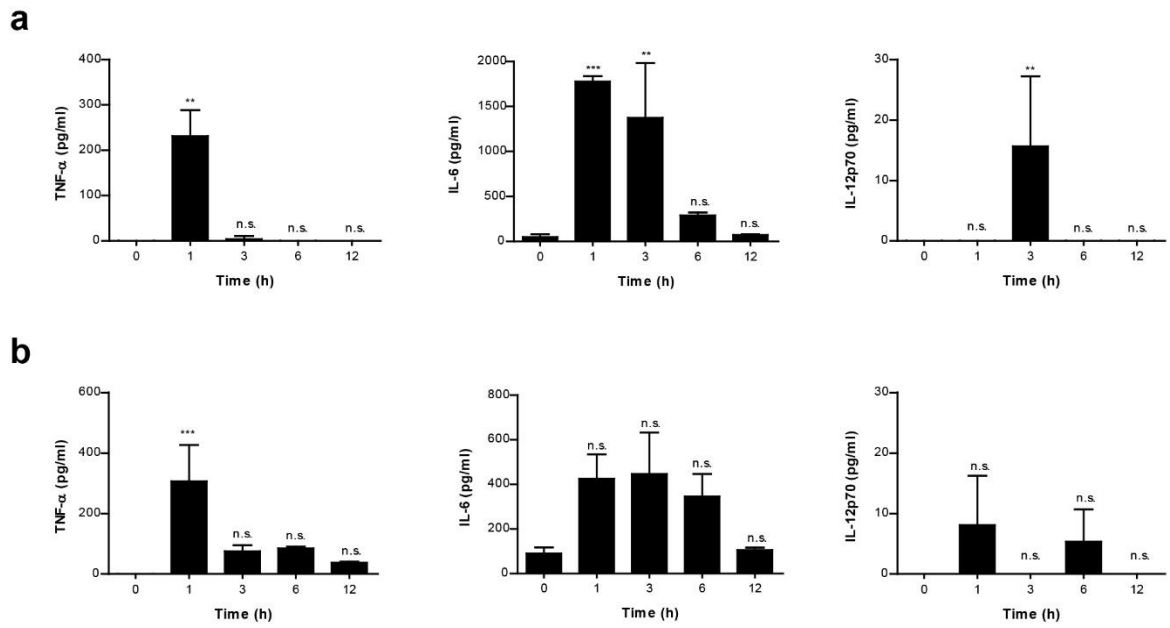

**Supplementary Figure 9. Kinetic quantification of cytokines after *E. coli*  $\Delta msbB$  OMV injection. a,b**, Release of pro-inflammatory cytokines TNF- $\alpha$ , IL-6, and IL-12p70 in blood sera (a) and tumor cell lysates (b) after single intravenous injection of *E. coli*  $\Delta msbB$  OMVs (5  $\mu$ g in total protein) to mice bearing CT26 tumors at different time points. Data are shown as the mean  $\pm$  s.d. ( $n = 6$  mice per group). n.s., \*\*, and \*\*\* indicate not significant,  $P < 0.01$ , and  $P < 0.001$ , respectively, analysed by one-way ANOVA with Bonferroni multiple comparisons post-test.

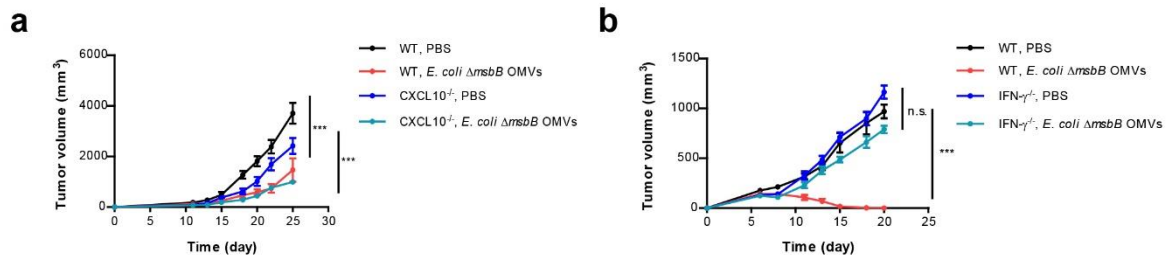

**Supplementary Figure 10. Effect of CXCL10 and IFN- $\gamma$  on *E. coli*  $\Delta msbB$  OMV antitumor response. a,** Tumor volume of wildtype C57BL/6 mice and CXCL10 knockout (CXCL10<sup>-/-</sup>) mice bearing B16BL6 tumor measured after *E. coli*  $\Delta msbB$  OMV-treatments. **b,** Tumor volume of wildtype BALB/c mice and IFN- $\gamma$  knockout (IFN- $\gamma$ <sup>-/-</sup>) mice bearing CT26 tumor measured after *E. coli*  $\Delta msbB$  OMV-treatments. Data are presented as the mean  $\pm$  s.d. ( $n = 6$  mice per group). n.s. and \*\*\* indicate non significant and  $P < 0.001$ , respectively, analysed by two-way ANOVA with Bonferroni multiple comparisons post-test.

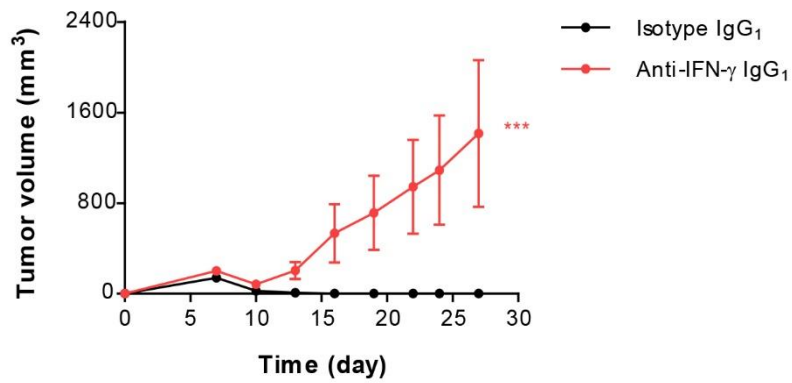

**Supplementary Figure 11. Effect of IFN- $\gamma$  on *E. coli*  $\Delta msbB$  OMV antitumor response.**

Tumor volume of BALB/c mice bearing CT26 tumor measured after mouse monoclonal anti-IFN- $\gamma$  antibodies (200  $\mu\text{g}$ ) and  $\Delta msbB$  OMV (5  $\mu\text{g}$  in total protein amount) treatments or control isotype IgG<sub>1</sub> antibodies (200  $\mu\text{g}$ ) and  $\Delta msbB$  OMV (5  $\mu\text{g}$  in total protein amount) treatments. Data are presented as the mean  $\pm$  s.d. ( $n = 5$  mice per group). \*\*\* indicates  $P < 0.001$  analysed by two-way ANOVA.

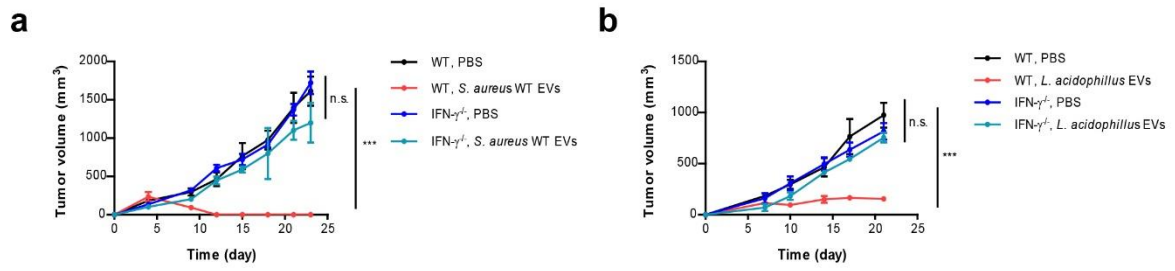

**Supplementary Figure 12. Effect of IFN- $\gamma$  on Gram-positive bacterial extracellular vesicles antitumor response. a,b**, Tumor volume of wildtype BALB/c mice and IFN- $\gamma$ -deficient (IFN- $\gamma$ <sup>-/-</sup>) mice bearing CT26 tumor measured after *S. aureus* wildtype extracellular vesicles (EVs) (a) and *L. acidophilus* extracellular vesicles (EVs) (b) treatments. Data are presented as the mean  $\pm$  s.d. ( $n = 5$  mice per group). n.s. and \*\*\* indicate non significant and  $P < 0.001$ , respectively, analysed by two-way ANOVA with Bonferroni multiple comparisons post-test.

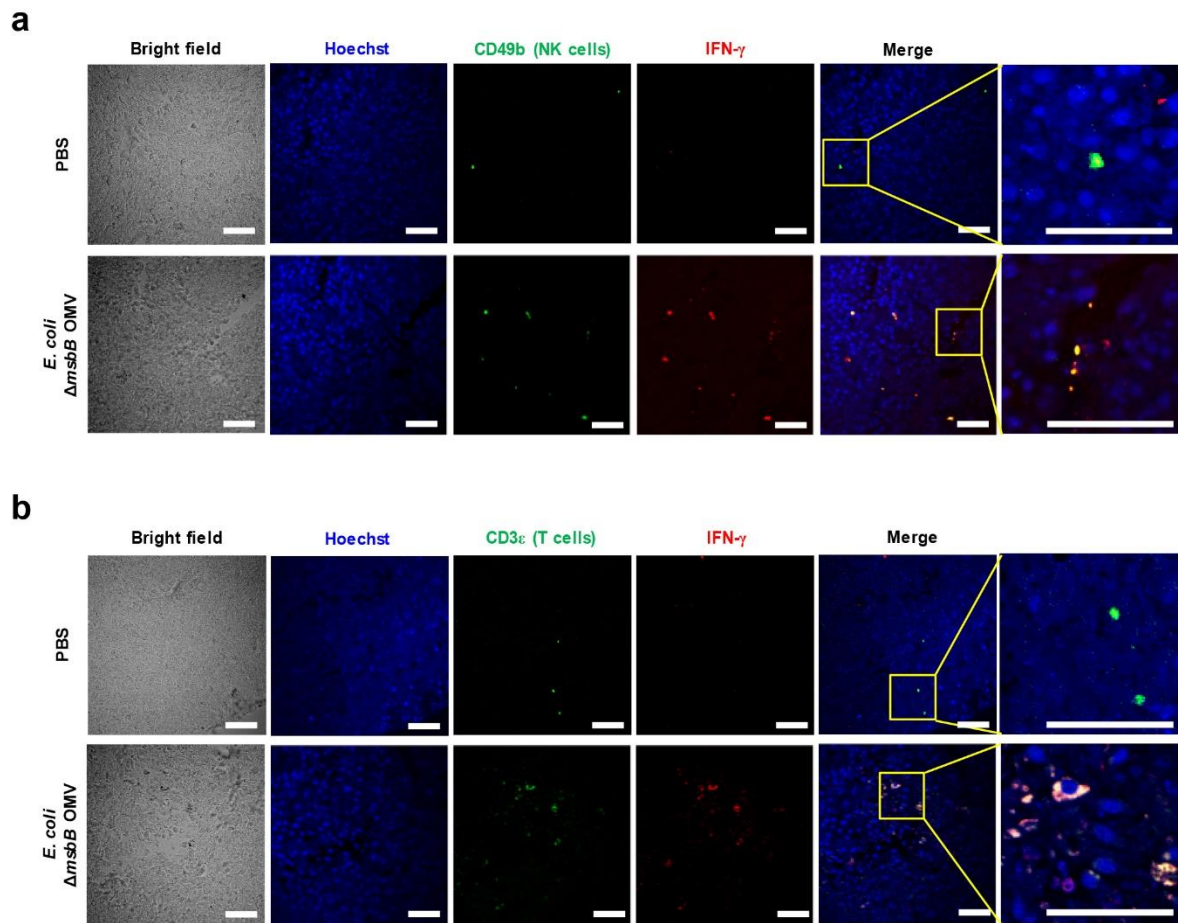

**Supplementary Figure 13. NK and T cells produce IFN- $\gamma$  in *E. coli*  $\Delta$ msbB OMV-treated tumors. a,b, Confocal images of tumor tissues isolated from wildtype mice bearing CT26 tumors, stained for IFN- $\gamma$  and NK cells (a) or T cells (b) 48 h after intravenous injections of *E. coli*  $\Delta$ msbB OMVs. The cell nucleus is stained in blue (Hoechst) while NK and T cells are shown by green fluorescence signal and IFN- $\gamma$  is shown in red fluorescence signal, respectively. Scale bars, 50  $\mu$ m.**

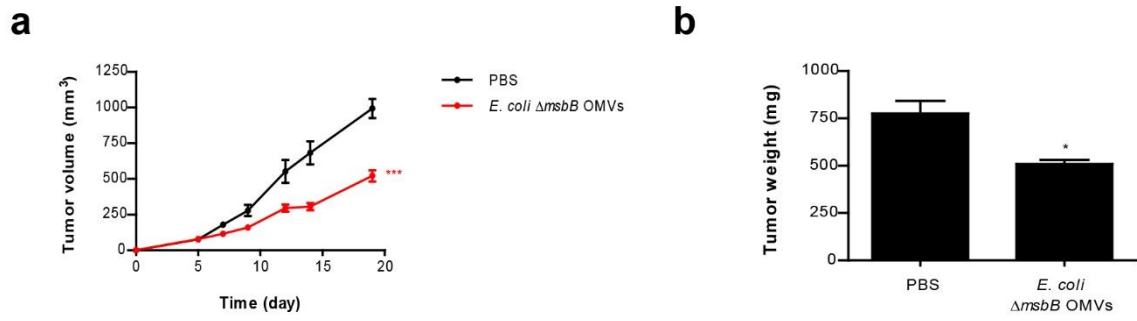

**Supplementary Figure 14. Importance of T cells on OMV antitumor effect. a,b,** Tumor volume of athymic nude (NU/J (Foxn1nu/Foxn1nu), F120) mice bearing CT26 tumor measured after *E. coli*  $\Delta msbB$  OMV-treatments (**a**) and tumor weight at the end of the experiment (**b**). Data are presented as the mean  $\pm$  s.d. ( $n = 6$  mice per group). \* and \*\*\* indicate  $P < 0.05$  and  $P < 0.001$ , respectively, analysed by two-way ANOVA (**a**) and unpaired Student's t-test (**b**).

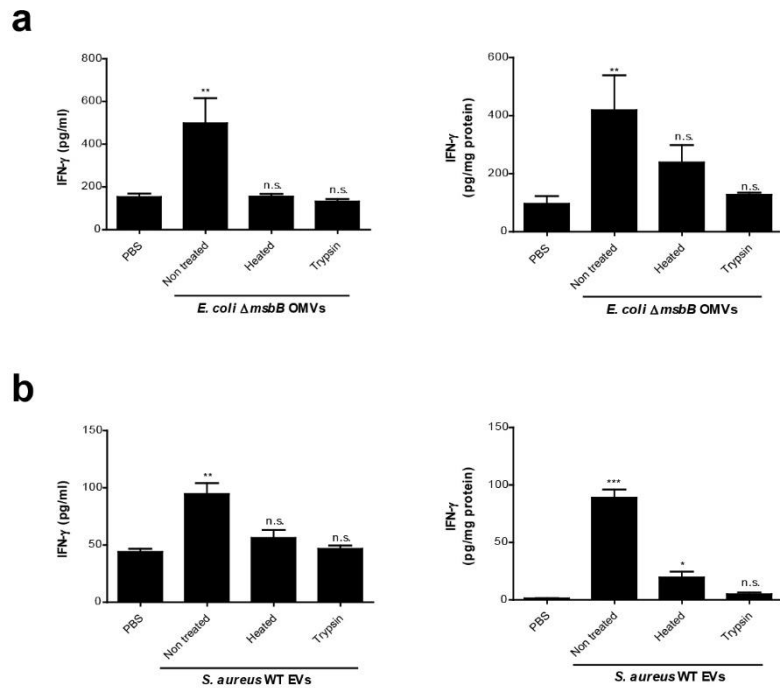

**Supplementary Figure 15. Importance of vesicular surface proteins on IFN- $\gamma$  production.**

**a**, Release of IFN- $\gamma$  in blood sera at 6 h (left) and tumor cell lysates at 48 h (right) after single intravenous injection of intact, heated, or trypsin-treated *E. coli*  $\Delta$ msbB OMVs (5  $\mu$ g in total protein amount) to mice bearing CT26 tumors. **b**, Release of IFN- $\gamma$  in blood sera at 6 h (left) and tumor cell lysates at 48 h (right) after single intravenous injection of intact, heated, or trypsin-treated *S. aureus* wildtype extracellular vesicles (EVs) (5  $\mu$ g in total protein amount) to mice bearing CT26 tumors. Data are shown as the mean  $\pm$  s.d. ( $n = 6$  mice per group). n.s., \*, \*\*, and \*\*\* indicate not significant,  $P < 0.05$ ,  $P < 0.01$ , and  $P < 0.001$ , respectively, analysed by one-way ANOVA. Bonferroni multiple comparisons post-test was applied to compare treated group with PBS group of each mouse.



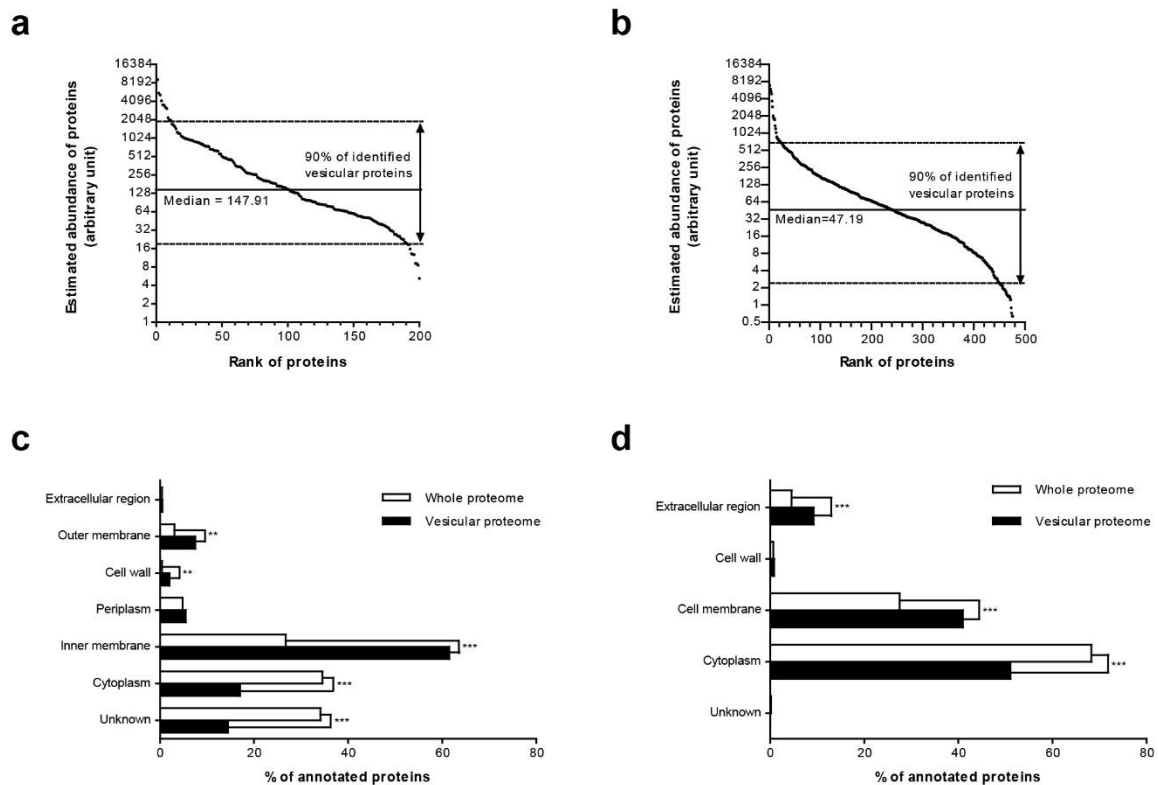

**Supplementary Figure 16. Proteomic analysis on extracellular vesicles derived from *E. coli* W3110  $\Delta$ msbB and wildtype *S. aureus*.** **a,b**, The distribution of estimated abundance of *E. coli* W3110  $\Delta$ msbB (**a**) and wildtype *S. aureus* (**b**) vesicular proteins according to their abundance ranks. Note that the most of the identified proteins (~90%) are located within a range from 19.70 to 2010.38 (**a**; median = 147.91), and from 2.25 to 696.12 (**b**; median = 47.19). Neither yeast nor cow proteins were identified from proteomic analyses on two types of extracellular vesicles. **c,d**, Enriched subcellular localizations of *E. coli* W3110  $\Delta$ msbB (**c**) and wildtype *S. aureus* (**d**) vesicular proteins over the cellular proteins. White and black bars indicate the percentages in cellular and vesicular proteins, respectively. \*\* and \*\*\* indicate  $P < 0.01$  and  $P < 0.001$ , respectively, analysed by Fisher's exact test.

**Supplementary Table 1. Proteins identified from *E. coli* W3110 *AmsbB* outer membrane vesicles (OMVs)**

| <b>Index</b>                       | <b>Protein name</b>                                      | <b>UniProt accession</b> | <b>Gene symbol</b> | <b>APEX score<sup>a)</sup></b> |
|------------------------------------|----------------------------------------------------------|--------------------------|--------------------|--------------------------------|
| <b><i>Extracellular region</i></b> |                                                          |                          |                    |                                |
| 1                                  | Flagellin                                                | P04949                   | fliC               | 82.40                          |
| <b><i>Outer membrane</i></b>       |                                                          |                          |                    |                                |
| 1                                  | Outer membrane protein C                                 | P06996                   | ompC               | 260.67                         |
| 2                                  | Outer membrane protein A                                 | P0A910                   | ompA               | 112.98                         |
| 3                                  | Protease 7                                               | P09169                   | ompT               | 84.13                          |
| 4                                  | Probable outer membrane usher protein ElfC               | P75857                   | elfC               | 69.65                          |
| 5                                  | Outer membrane protein X                                 | P0A917                   | ompX               | 66.31                          |
| 6                                  | Putative outer membrane usher protein YfcU               | P77196                   | yfcU               | 61.85                          |
| 7                                  | Membrane-bound lytic murein transglycosylase A           | P0A935                   | mltA               | 61.14                          |
| 8                                  | Outer-membrane lipoprotein LolB                          | P61320                   | lolB               | 42.43                          |
| 9                                  | Probable lipoprotein YiaD                                | P37665                   | yiaD               | 40.24                          |
| 10                                 | Maltoporin                                               | P02943                   | lamB               | 39.16                          |
| 11                                 | Nucleoside-specific channel-forming protein tsx          | P0A927                   | tsx                | 36.37                          |
| 12                                 | Membrane-bound lytic murein transglycosylase F           | P0AGC5                   | mltF               | 27.32                          |
| 13                                 | Outer membrane protein assembly factor BamA              | P0A940                   | bamA               | 26.44                          |
| 14                                 | Peptidoglycan-associated lipoprotein                     | P0A912                   | pal                | 18.71                          |
| 15                                 | Vitamin B12 transporter BtuB                             | P06129                   | btuB               | 5.19                           |
| <b><i>Cell wall</i></b>            |                                                          |                          |                    |                                |
| 1                                  | Penicillin-binding protein 1B                            | P02919                   | mrcB               | 752.68                         |
| 2                                  | Cytochrome c-type protein TorC                           | P33226                   | torC               | 264.37                         |
| 3                                  | Cytochrome c-type protein TorY                           | P52005                   | torY               | 92.92                          |
| 4                                  | Bifunctional (p)ppGpp synthase/hydrolase SpoT            | P0AG24                   | spoT               | 20.39                          |
| <b><i>Periplasm</i></b>            |                                                          |                          |                    |                                |
| 1                                  | Acid stress chaperone HdeA                               | P0AES9                   | hdeA               | 1036.60                        |
| 2                                  | Protein TonB                                             | P02929                   | tonB               | 900.91                         |
| 3                                  | Zinc resistance-associated protein                       | P0AAA9                   | zraP               | 817.37                         |
| 4                                  | Blue copper oxidase CueO                                 | P36649                   | cueO               | 484.20                         |
| 5                                  | Thiol:disulfide interchange protein DsbE                 | P0AA86                   | dsbE               | 333.13                         |
| 6                                  | Thiol:disulfide interchange protein DsbG                 | P77202                   | dsbG               | 67.27                          |
| 7                                  | Formate-dependent nitrite reductase complex subunit NrfF | P32711                   | nrfF               | 64.54                          |
| 8                                  | Uncharacterized ferredoxin-like protein YdhX             | P77375                   | ydhX               | 60.08                          |
| 9                                  | Probable L,D-transpeptidase YbiS                         | P0AAX8                   | ybiS               | 50.72                          |
| 10                                 | Protein TolB                                             | P0A855                   | tolB               | 12.77                          |
| 11                                 | Maltose-binding periplasmic protein                      | P0AEX9                   | malE               | 8.55                           |
| <b><i>Inner membrane</i></b>       |                                                          |                          |                    |                                |
| 1                                  | Endolytic murein transglycosylase                        | P28306                   | mltG               | 3559.64                        |
| 2                                  | Hydrogenase-4 component F                                | P77437                   | hyfF               | 3259.59                        |
| 3                                  | Uncharacterized permease YjhF                            | P39357                   | yjhF               | 3104.58                        |
| 4                                  | Flagellar motor switch protein FliN                      | P15070                   | fliN               | 2191.00                        |
| 5                                  | Inner membrane protein YdgC                              | P0ACX0                   | ydgC               | 1739.67                        |
| 6                                  | Arginine ABC transporter permease protein ArtM           | P0AE30                   | artM               | 1678.92                        |
| 7                                  | Phosphatidylglycerophosphatase C                         | P0AD42                   | pgpC               | 1589.05                        |
| 8                                  | Small toxic protein TisB                                 | A5A627                   | tisB               | 1452.02                        |
| 9                                  | Cell division protein ZipA                               | P77173                   | zipA               | 1274.20                        |

|    |                                                            |        |      |         |
|----|------------------------------------------------------------|--------|------|---------|
| 10 | Uncharacterized protein YggT                               | P64564 | yggT | 1230.03 |
| 11 | Inner membrane protein YcfZ                                | P75961 | ycfZ | 1210.64 |
| 12 | ATP synthase protein I                                     | P0ABC0 | atpI | 1066.52 |
| 13 | Uncharacterized protein YigF                               | P27842 | yigF | 1014.01 |
| 14 | Ferric enterobactin transport system permease protein FepD | P23876 | fepD | 990.28  |
| 15 | Probable acyltransferase YihG                              | P32129 | yihG | 985.51  |
| 16 | Protein SanA                                               | P0AFY2 | sanA | 962.04  |
| 17 | Inner membrane protein YnbA                                | P76090 | ynbA | 947.46  |
| 18 | Inner membrane protein YbaN                                | P0AAR5 | ybaN | 945.14  |
| 19 | Glycine betaine uptake system permease protein YehY        | P33361 | yehY | 926.27  |
| 20 | Protein TonB                                               | P02929 | tonB | 900.91  |
| 21 | Multidrug export protein EmrA                              | P27303 | emrA | 883.58  |
| 22 | Flagellar biosynthetic protein FliQ                        | P0AC07 | fliQ | 858.53  |
| 23 | Cytochrome bo(3) ubiquinol oxidase subunit 2               | P0ABJ1 | cyoA | 855.62  |
| 24 | High-affinity gluconate transporter                        | P39835 | gntT | 781.63  |
| 25 | Phage shock protein G                                      | P32696 | pspG | 760.02  |
| 26 | Penicillin-binding protein 1B                              | P02919 | mrcB | 752.68  |
| 27 | Uncharacterized inner membrane transporter YedA            | P0AA70 | yedA | 744.65  |
| 28 | Uncharacterized membrane protein YohP                      | C1P609 | yohP | 674.15  |
| 29 | Glutathione-regulated potassium-efflux system protein KefB | P45522 | kefB | 669.47  |
| 30 | ATP synthase subunit c                                     | P68699 | atpE | 661.73  |
| 31 | UPF0057 membrane protein YqaE                              | P0AE42 | yqaE | 643.68  |
| 32 | Enterobactin exporter EntS                                 | P24077 | entS | 635.07  |
| 33 | Multidrug resistance protein MdtB                          | P76398 | mdtB | 630.64  |
| 34 | 2-keto-3-deoxygluconate permease                           | P0A712 | kdgT | 626.00  |
| 35 | Inner membrane protein YghQ                                | Q46841 | yghQ | 565.42  |
| 36 | DsdX permease                                              | P08555 | dsdX | 558.86  |
| 37 | Nickel transport system permease protein NikC              | P0AFA9 | nikC | 518.43  |
| 38 | Putative electron transport protein YccM                   | P52636 | yccM | 494.15  |
| 39 | Glutathione-regulated potassium-efflux system protein KefC | P03819 | kefC | 464.60  |
| 40 | Sec-independent protein translocase protein TatA           | P69428 | tatA | 455.76  |
| 41 | Ferredoxin-type protein NapH                               | P33934 | napH | 455.50  |
| 42 | Lipid A export ATP-binding/permease protein MsbA           | P60752 | msbA | 453.01  |
| 43 | Tyrosine-protein kinase wzc                                | P76387 | wzc  | 406.08  |
| 44 | Inner membrane protein YphA                                | P0AD47 | yphA | 370.29  |
| 45 | Nitrate/nitrite sensor protein NarX                        | P0AFA2 | narX | 352.46  |
| 46 | Phosphate transport system permease protein PstC           | P0AGH8 | pstC | 350.56  |
| 47 | Peptide transport system permease protein SapB             | P0AGH3 | sapB | 347.35  |
| 48 | Anaerobic C4-dicarboxylate transporter DcuA                | P0ABN5 | dcuA | 343.69  |
| 49 | Thiol:disulfide interchange protein DsbE                   | P0AA86 | dsbE | 333.13  |
| 50 | Signal transduction histidine-protein kinase AtoS          | Q06067 | atoS | 302.21  |
| 51 | Uncharacterized protein YdbH                               | P52645 | ydbH | 283.35  |
| 52 | Probable cystine transporter YijE                          | P0ABT8 | yijE | 273.33  |
| 53 | Cation/acetate symporter ActP                              | P32705 | actP | 269.66  |
| 54 | Cytochrome c-type protein TorC                             | P33226 | torC | 264.37  |
| 55 | Probable Ni/Fe-hydrogenase 2 b-type cytochrome subunit     | P37180 | hybB | 258.98  |
| 56 | Protein DedA                                               | P0ABP6 | dedA | 258.11  |
| 57 | Low conductance mechanosensitive channel YnaI              | P0AEB5 | ynaI | 235.59  |
| 58 | Protein sirB2                                              | Q46755 | ychQ | 222.09  |
| 59 | Low-affinity gluconate transporter                         | P0AC96 | gntU | 215.17  |
| 60 | Protein HemY                                               | P0ACB7 | hemY | 206.16  |
| 61 | Inner membrane protein YgiZ                                | Q46867 | ygiZ | 202.47  |

|     |                                                                                |        |      |        |
|-----|--------------------------------------------------------------------------------|--------|------|--------|
| 62  | UPF0259 membrane protein YciC                                                  | P21365 | yciC | 201.70 |
| 63  | Arsenical pump membrane protein                                                | P0AB93 | arsB | 198.73 |
| 64  | Sec-independent protein translocase protein TatE                               | P0A843 | tatE | 189.49 |
| 65  | Formate dehydrogenase, nitrate-inducible, iron-sulfur subunit                  | P0AAJ3 | fdnH | 185.89 |
| 66  | Putrescine transport system permease protein PotH                              | P31135 | potH | 185.75 |
| 67  | L-fucose-proton symporter                                                      | P11551 | fucP | 182.44 |
| 68  | Flagellar protein FliO                                                         | P22586 | fliO | 167.98 |
| 69  | Iron(3+)-hydroxamate import system permease protein FhuB                       | P06972 | fhuB | 165.98 |
| 70  | Cell shape-determining protein MreC                                            | P16926 | mreC | 159.45 |
| 71  | Nucleoside permease NupC                                                       | P0AFF2 | nupC | 136.94 |
| 72  | Inner membrane ABC transporter permease protein YcjO                           | P0AFR7 | ycjO | 132.69 |
| 73  | Formate hydrogenlyase subunit 4                                                | P16430 | hycD | 129.49 |
| 74  | Sodium/proline symporter                                                       | P07117 | putP | 125.31 |
| 75  | Fosmidomycin resistance protein                                                | P52067 | fsr  | 116.82 |
| 76  | Inner membrane transport permease YbhR                                         | P0AFP9 | ybhR | 102.52 |
| 77  | Sensor protein PhoQ                                                            | P23837 | phoQ | 98.20  |
| 78  | Formate dehydrogenase-O iron-sulfur subunit                                    | P0AAJ5 | fdoH | 97.65  |
| 79  | Inner membrane protein YjiY                                                    | P39396 | yjiY | 97.58  |
| 80  | Ribosome-associated ATPase                                                     | P37624 | rbbA | 95.20  |
| 81  | Cytochrome c-type protein TorY                                                 | P52005 | torY | 92.92  |
| 82  | DNA translocase FtsK                                                           | P46889 | ftsK | 92.85  |
| 83  | PTS system N-acetylglucosamine-specific EIICBA component                       | P09323 | nagE | 87.16  |
| 84  | UPF0092 membrane protein YajC                                                  | P0ADZ7 | yajC | 86.41  |
| 85  | High-affinity branched-chain amino acid transport system permease protein LivM | P22729 | livM | 84.91  |
| 86  | Proton/glutamate-aspartate symporter                                           | P21345 | gltP | 84.07  |
| 87  | Uncharacterized protein YcgG                                                   | P75995 | ycgG | 82.85  |
| 88  | Flagellin                                                                      | P04949 | fliC | 82.40  |
| 89  | Elongation factor Tu 1                                                         | P0CE47 | tufA | 78.42  |
| 90  | O-antigen ligase                                                               | P27243 | rfaL | 78.03  |
| 91  | Modulator of FtsH protease HflC                                                | P0ABC3 | hflC | 77.38  |
| 92  | Putative transport protein YidE                                                | P60872 | yidE | 77.12  |
| 93  | Cyclic di-GMP-binding protein                                                  | P37652 | bcsB | 71.78  |
| 94  | Cell division protein DamX                                                     | P11557 | damX | 69.14  |
| 95  | DNA-damage-inducible protein F                                                 | P28303 | dinF | 68.54  |
| 96  | Succinate dehydrogenase iron-sulfur subunit                                    | P07014 | sdhB | 68.33  |
| 97  | Inner membrane protein YeeR                                                    | P76361 | yeeR | 65.11  |
| 98  | Membrane-bound lytic murein transglycosylase A                                 | P0A935 | mltA | 61.14  |
| 99  | Thiamine transport system permease protein ThiP                                | P31549 | thiP | 60.00  |
| 100 | Uracil permease                                                                | P0AGM7 | uraA | 57.89  |
| 101 | Cell division protein DedD                                                     | P09549 | dedD | 55.03  |
| 102 | Small-conductance mechanosensitive channel                                     | P0C0S1 | mscS | 54.24  |
| 103 | Inner membrane protein YabI                                                    | P30149 | yabI | 54.13  |
| 104 | Protein AbrB                                                                   | P75747 | abrB | 52.15  |
| 105 | Inner membrane ABC transporter ATP-binding protein YddA                        | P31826 | yddA | 50.95  |
| 106 | Uncharacterized transporter YeaV                                               | P0ABD1 | yeaV | 50.60  |
| 107 | Putative O-antigen transporter                                                 | P37746 | rfbX | 49.21  |
| 108 | Dihydrolipoyl dehydrogenase                                                    | P0A9P0 | lpdA | 48.02  |
| 109 | Guanine/hypoxanthine permease GhxP                                             | P0AF52 | ghxP | 46.14  |
| 110 | Respiratory nitrate reductase 2 beta chain                                     | P19318 | narY | 44.98  |
| 111 | ATP synthase subunit alpha                                                     | P0ABB0 | atpA | 43.54  |
| 112 | Probable lipoprotein YiaD                                                      | P37665 | yiaD | 40.24  |

|     |                                                          |        |      |       |
|-----|----------------------------------------------------------|--------|------|-------|
| 113 | Uncharacterized ABC transporter ATP-binding protein YejF | P33916 | yejF | 40.23 |
| 114 | Lipid III flippase                                       | P0AAA7 | wzxE | 34.07 |
| 115 | Methyl-accepting chemotaxis protein II                   | P07017 | tar  | 31.82 |
| 116 | ATP synthase subunit beta                                | P0ABB4 | atpD | 27.33 |
| 117 | Chain length determinant protein                         | P76372 | wzzB | 25.31 |
| 118 | Uncharacterized protein YhgE                             | P45804 | yhgE | 22.34 |
| 119 | Bifunctional (p)ppGpp synthase/hydrolase SpoT            | P0AG24 | spoT | 20.39 |
| 120 | RNA polymerase sigma factor RpoH                         | P0AGB3 | rpoH | 18.51 |
| 121 | Mechanosensitive channel MscK                            | P77338 | mscK | 15.69 |
| 122 | Inner membrane protein YccS                              | P75870 | yccS | 12.86 |
| 123 | UPF0748 lipoprotein YddW                                 | P64426 | yddW | 9.04  |

### ***Cytoplasm***

|    |                                                                                           |        |      |         |
|----|-------------------------------------------------------------------------------------------|--------|------|---------|
| 1  | FKBP-type peptidyl-prolyl cis-trans isomerase SlyD                                        | P0A9K9 | slyD | 9250.87 |
| 2  | Regulator of ribonuclease activity B                                                      | P0AF90 | rraB | 5193.47 |
| 3  | Protein PhnA                                                                              | P0AFJ1 | phnA | 4173.32 |
| 4  | UPF0381 protein YfcZ                                                                      | P0AD33 | yfcZ | 3553.43 |
| 5  | 30S ribosomal protein S6                                                                  | P02358 | rpsF | 817.30  |
| 6  | Dual-specificity RNA methyltransferase RlmN                                               | P36979 | rlmN | 482.42  |
| 7  | Sec-independent protein translocase protein TatA                                          | P69428 | tatA | 455.76  |
| 8  | GTPase Der                                                                                | P0A6P5 | der  | 315.82  |
| 9  | RNA polymerase sigma factor RpoD                                                          | P00579 | rpoD | 274.95  |
| 10 | Uncharacterized protein YicH                                                              | P31433 | yicH | 210.82  |
| 11 | Stringent starvation protein B                                                            | P0AFZ3 | sspB | 192.56  |
| 12 | Dihydroxy-acid dehydratase                                                                | P05791 | ilvD | 168.24  |
| 13 | Thymidylate synthase                                                                      | P0A884 | thyA | 161.47  |
| 14 | GTPase ObgE/CgtA                                                                          | P42641 | obgE | 137.47  |
| 15 | tRNA-specific 2-thiouridylase MnmA                                                        | P25745 | mnmA | 98.75   |
| 16 | Ribosome-associated ATPase                                                                | P37624 | rbbA | 95.20   |
| 17 | Putative uncharacterized protein YehQ                                                     | P33353 | yehQ | 83.29   |
| 18 | Uncharacterized protein YcgG                                                              | P75995 | ycgG | 82.85   |
| 19 | Elongation factor Tu 1                                                                    | POCE47 | tufA | 78.42   |
| 20 | Uncharacterized sugar kinase YgcE                                                         | P55138 | ygcE | 78.32   |
| 21 | Membrane-bound lytic murein transglycosylase A                                            | P0A935 | mltA | 61.14   |
| 22 | Dihydrolipoyllysine-residue acetyltransferase component of pyruvate dehydrogenase complex | P06959 | aceF | 57.33   |
| 23 | DNA-directed RNA polymerase subunit beta                                                  | P0A8V2 | rpoB | 53.40   |
| 24 | 60 kDa chaperonin                                                                         | P0A6F5 | groL | 51.70   |
| 25 | Malate dehydrogenase                                                                      | P61889 | mdh  | 51.57   |
| 26 | Dihydrolipoyl dehydrogenase                                                               | P0A9P0 | lpdA | 48.02   |
| 27 | HMP-PP phosphatase                                                                        | P46891 | cof  | 38.46   |
| 28 | Pyruvate dehydrogenase E1 component                                                       | P0AFG8 | aceE | 35.32   |
| 29 | 30S ribosomal protein S7                                                                  | P02359 | rpsG | 23.58   |
| 30 | DNA-directed RNA polymerase subunit beta'                                                 | P0A8T7 | rpoC | 22.77   |
| 31 | Bifunctional (p)ppGpp synthase/hydrolase SpoT                                             | P0AG24 | spoT | 20.39   |
| 32 | Lysine--tRNA ligase                                                                       | P0A8N3 | lysS | 19.71   |
| 33 | RNA polymerase sigma factor RpoH                                                          | P0AGB3 | rpoH | 18.51   |
| 34 | Glutamine synthetase                                                                      | P0A9C5 | glnA | 9.12    |

### ***Unknown***

|   |                                              |        |      |         |
|---|----------------------------------------------|--------|------|---------|
| 1 | Uncharacterized protein YpjK                 | P52134 | ypjK | 5582.98 |
| 2 | Uncharacterized protein YkfM                 | A5A605 | ykfM | 2014.71 |
| 3 | Uncharacterized ferredoxin-like protein YfhL | P52102 | yfhL | 2010.38 |
| 4 | Aldehyde reductase YahK                      | P75691 | yahK | 1102.66 |
| 5 | Small toxic protein ShoB                     | C1P611 | shoB | 886.83  |

|    |                                                                |        |       |        |
|----|----------------------------------------------------------------|--------|-------|--------|
| 6  | Uncharacterized protein YdaT                                   | P76064 | ydaT  | 748.32 |
| 7  | Xanthine dehydrogenase iron-sulfur-binding subunit             | Q46801 | xdhC  | 436.09 |
| 8  | UPF0153 protein YeiW                                           | P0AFT8 | yeiW  | 266.54 |
| 9  | Uncharacterized protein YpjB                                   | P76612 | ypjB  | 223.76 |
| 10 | Uncharacterized protein YhdP                                   | P46474 | yhdP  | 206.17 |
| 11 | Antitermination protein Q homolog from lambdoid prophage DLP12 | Q47274 | quuD  | 166.92 |
| 12 | Transposase InsD for insertion element IS2A                    | P0CF53 | insD1 | 157.69 |
| 13 | Uncharacterized protein DinQ                                   | A5A624 | dinQ  | 153.34 |
| 14 | Uncharacterized protein YjfM                                   | P39295 | yjfM  | 147.92 |
| 15 | Protein FixC                                                   | P68644 | fixC  | 147.92 |
| 16 | Uncharacterized protein YdfU                                   | P76162 | ydfU  | 133.09 |
| 17 | Protein YdeP                                                   | P77561 | ydeP  | 129.36 |
| 18 | UPF0260 protein YcgN                                           | P0A8L5 | ycgN  | 103.02 |
| 19 | Putative glycyl-radical enzyme activating enzyme YjjW          | P39409 | yjjW  | 101.00 |
| 20 | Uncharacterized protein YkgJ                                   | P0AAL9 | ykgJ  | 91.46  |
| 21 | IlvGMEDA operon leader peptide                                 | P62522 | ilvL  | 67.39  |
| 22 | Exodeoxyribonuclease 8                                         | P15032 | recE  | 65.77  |
| 23 | Putative cyclic di-GMP phosphodiesterase YliE                  | P75800 | yliE  | 61.05  |
| 24 | Alpha-xylosidase                                               | P31434 | yicI  | 40.72  |
| 25 | Uncharacterized protein YccE                                   | P36661 | yccE  | 37.37  |
| 26 | Sulfoquinovosidase                                             | P32138 | yihQ  | 31.27  |
| 27 | Putative uncharacterized protein YjiV                          | P39393 | yjiV  | 30.27  |
| 28 | FeS cluster assembly protein SufB                              | P77522 | sufB  | 25.37  |
| 29 | GDP-mannose 4,6-dehydratase                                    | P0AC88 | gmd   | 13.10  |

<sup>a)</sup> The proteins are ordered from the highest to lowest APEX score. APEX normalization factor = 100,000.

**Supplementary Table 2. Proteins identified from *S. aureus* RN4220 extracellular vesicles**

| <b>Index</b>                | <b>Protein name</b>                                                        | <b>UniProt accession</b> | <b>Gene symbol</b> | <b>APEX score<sup>a)</sup></b> |
|-----------------------------|----------------------------------------------------------------------------|--------------------------|--------------------|--------------------------------|
| <i>Extracellular region</i> |                                                                            |                          |                    |                                |
| 1                           | Staphylococcal secretory antigen ssaA2                                     | Q2G2J2                   | ssaA2              | 4977.34                        |
| 2                           | ABC transporter, substrate-binding protein, putative                       | Q2G2D8                   | SAOUHSC_00634      | 3754.05                        |
| 3                           | 5'-nucleotidase, lipoprotein e(P4) family                                  | Q2G170                   | SAOUHSC_00284      | 2960.72                        |
| 4                           | Bifunctional autolysin                                                     | Q2FZK7                   | atl                | 1757.82                        |
| 5                           | N-acetylmuramoyl-L-alanine amidase sle1                                    | Q2G0U9                   | sle1               | 794.68                         |
| 6                           | ABC transporter periplasmic binding protein, putative                      | Q2FW75                   | SAOUHSC_02430      | 671.36                         |
| 7                           | Lipoprotein                                                                | Q2FZZ0                   | SAOUHSC_00844      | 628.90                         |
| 8                           | Uncharacterized protein                                                    | Q2G0F2                   | SAOUHSC_00617      | 545.59                         |
| 9                           | Uncharacterized protein                                                    | Q2FVW9                   | SAOUHSC_02554      | 491.28                         |
| 10                          | Lipase 2                                                                   | Q2G155                   | lip2               | 490.60                         |
| 11                          | Periplasmic binding protein, putative                                      | Q2G1N4                   | SAOUHSC_00074      | 390.76                         |
| 12                          | Uncharacterized protein                                                    | Q2G019                   | SAOUHSC_00808      | 378.24                         |
| 13                          | Probable transglycosylase IsaA                                             | Q2FV52                   | isaA               | 309.40                         |
| 14                          | Enolase                                                                    | Q2G028                   | eno                | 272.29                         |
| 15                          | LysM domain protein                                                        | Q2FV81                   | SAOUHSC_02855      | 234.21                         |
| 16                          | Uncharacterized protein                                                    | Q2G0Z9                   | SAOUHSC_00362      | 214.11                         |
| 17                          | Uncharacterized protein                                                    | Q2G071                   | SAOUHSC_00749      | 204.08                         |
| 18                          | Molybdenum ABC transporter, periplasmic molybdate-binding protein          | Q2FVX4                   | SAOUHSC_02549      | 199.91                         |
| 19                          | Uncharacterized protein                                                    | Q2G264                   | SAOUHSC_01180      | 188.47                         |
| 20                          | Staphylococcal secretory antigen SsaA                                      | Q2FV55                   | ssaA               | 180.57                         |
| 21                          | Uncharacterized protein                                                    | Q2FVF5                   | SAOUHSC_02759      | 152.59                         |
| 22                          | N-acetylmuramoyl-L-alanine amidase domain-containing protein SAOUHSC_02979 | Q2G222                   | SAOUHSC_02979      | 131.51                         |
| 23                          | Uncharacterized protein                                                    | Q2FZG5                   | SAOUHSC_01039      | 98.77                          |
| 24                          | Immunoglobulin-binding protein sbi                                         | Q2FVK5                   | sbi                | 83.10                          |
| 25                          | Peptide ABC transporter, peptide-binding protein, putative                 | Q2FVE7                   | SAOUHSC_02767      | 56.71                          |
| 26                          | Uncharacterized protein                                                    | Q2FWY6                   | SAOUHSC_02121      | 55.83                          |
| 27                          | Lipase 1                                                                   | Q2FUU5                   | lipA               | 55.27                          |
| 28                          | Lipoprotein                                                                | Q2G0V0                   | SAOUHSC_00426      | 40.66                          |
| 29                          | Uncharacterized protein                                                    | Q2FVL7                   | SAOUHSC_02694      | 36.93                          |
| 30                          | Uncharacterized protein                                                    | Q2G0C0                   | SAOUHSC_00685      | 31.61                          |
| 31                          | Uncharacterized protein                                                    | Q2FY39                   | SAOUHSC_01627      | 27.70                          |
| 32                          | Uncharacterized protein                                                    | Q2G174                   | SAOUHSC_00279      | 24.90                          |

|    |                                                          |        |               |       |
|----|----------------------------------------------------------|--------|---------------|-------|
| 33 | Uncharacterized protein                                  | Q2G2G0 | SAOUHSC_00717 | 22.25 |
| 34 | Probable cell wall amidase LytH                          | Q2FXU3 | lytH          | 17.94 |
| 35 | Uncharacterized protein                                  | Q2G2Y5 | SAOUHSC_01920 | 17.60 |
| 36 | Uncharacterized protein SAOUHSC_00997                    | P52078 | SAOUHSC_00997 | 14.79 |
| 37 | Staphopain A                                             | Q2G2R8 | sspP          | 7.88  |
| 38 | Bacterial extracellular solute-binding protein, putative | Q2G1E9 | SAOUHSC_00176 | 7.51  |
| 39 | Serine-aspartate repeat-containing protein D             | Q2G0L4 | sdrD          | 6.70  |
| 40 | Iron-regulated surface determinant protein A             | Q2FZE9 | isdA          | 6.11  |
| 41 | Serine-rich adhesin for platelets                        | Q2FUW1 | sraP          | 5.01  |
| 42 | Lipoteichoic acid synthase                               | Q2G093 | ltaS          | 4.75  |
| 43 | Uncharacterized protein                                  | Q2G2T0 | SAOUHSC_01969 | 4.06  |
| 44 | Uncharacterized protein                                  | Q2FWN6 | SAOUHSC_02246 | 1.86  |

### ***Cell wall***

|   |                                              |        |               |       |
|---|----------------------------------------------|--------|---------------|-------|
| 1 | Uncharacterized protein                      | Q2G242 | SAOUHSC_00508 | 53.35 |
| 2 | Serine-aspartate repeat-containing protein D | Q2G0L4 | sdrD          | 6.70  |
| 3 | Iron-regulated surface determinant protein A | Q2FZE9 | isdA          | 6.11  |
| 4 | Serine-rich adhesin for platelets            | Q2FUW1 | sraP          | 5.01  |

### ***Cell membrane***

|    |                                                              |        |               |        |
|----|--------------------------------------------------------------|--------|---------------|--------|
| 1  | Uncharacterized protein                                      | Q2FYZ6 | SAOUHSC_01275 | 882.43 |
| 2  | ATP synthase subunit beta                                    | Q2FWF0 | atpD          | 830.88 |
| 3  | UPF0365 protein SAOUHSC_01676                                | Q2FXZ9 | SAOUHSC_01676 | 712.09 |
| 4  | ATP synthase subunit alpha                                   | Q2FWE8 | atpA          | 696.11 |
| 5  | Succinate dehydrogenase, flavoprotein chain TC0881, putative | Q2FZC8 | SAOUHSC_01104 | 685.62 |
| 6  | UPF0154 protein SAOUHSC_01338                                | Q2FYT7 | SAOUHSC_01338 | 590.02 |
| 7  | ATP synthase subunit b                                       | Q2G2F8 | atpF          | 549.54 |
| 8  | Probable quinol oxidase subunit 2                            | Q2FZJ9 | qoxA          | 512.45 |
| 9  | Preprotein translocase, YajC subunit                         | Q2FXT7 | SAOUHSC_01747 | 430.95 |
| 10 | UPF0478 protein SAOUHSC_01855                                | Q2G247 | SAOUHSC_01855 | 392.78 |
| 11 | Signal peptidase I                                           | Q2FZT7 | SAOUHSC_00903 | 371.46 |
| 12 | Probable quinol oxidase subunit 1                            | Q2FZK0 | qoxB          | 364.66 |
| 13 | PTS system glucose-specific EIICBA component                 | Q2G1G8 | ptsG          | 351.98 |
| 14 | Penicillin-binding protein 2                                 | Q2FYI0 | SAOUHSC_01467 | 318.86 |
| 15 | Uncharacterized protein                                      | Q2FXJ6 | SAOUHSC_01838 | 305.99 |
| 16 | Uncharacterized protein                                      | Q2G193 | SAOUHSC_00253 | 299.58 |
| 17 | Uncharacterized lipoprotein SAOUHSC_02650                    | Q2FVQ2 | SAOUHSC_02650 | 288.26 |



|    |                                                           |        |               |        |
|----|-----------------------------------------------------------|--------|---------------|--------|
| 18 | Uncharacterized protein                                   | Q2G0W5 | SAOUHSC_00409 | 287.89 |
| 19 | Uncharacterized protein                                   | Q2G1W5 | SAOUHSC_01908 | 286.75 |
| 20 | Foldase protein PrsA                                      | Q2G2S6 | prsA          | 285.64 |
| 21 | Uncharacterized protein                                   | Q2FVL2 | SAOUHSC_02699 | 280.26 |
| 22 | Cell division protein FtsA                                | O07325 | ftsA          | 274.81 |
| 23 | Uncharacterized protein                                   | Q2G257 | SAOUHSC_01477 | 266.27 |
| 24 | Iron-sulphur subunit of succinate dehydrogenase, putative | Q2FZC7 | SAOUHSC_01105 | 262.13 |
| 25 | MHC class II analog protein                               | Q2FWW1 | SAOUHSC_02161 | 261.04 |
| 26 | Uncharacterized protein                                   | Q2FXG3 | SAOUHSC_01884 | 239.39 |
| 27 | ATP synthase gamma chain                                  | Q2FWE9 | atpG          | 208.48 |
| 28 | Phospho-N-acetylmuramoyl-pentapeptide-transferase         | Q2FZ93 | mraY          | 198.19 |
| 29 | PTS system, fructose-specific IIABC component, putative   | Q2FUX0 | SAOUHSC_02975 | 187.12 |
| 30 | Uncharacterized protein                                   | Q2FWX6 | SAOUHSC_02145 | 183.08 |
| 31 | Septation ring formation regulator EzrA                   | Q2FXK8 | ezrA          | 175.50 |
| 32 | Transcriptional regulator, putative                       | Q2FVV8 | SAOUHSC_02583 | 168.04 |
| 33 | L-lactate permease                                        | Q2G1N9 | SAOUHSC_00067 | 165.74 |
| 34 | Uncharacterized protein                                   | Q2FVN6 | SAOUHSC_02666 | 162.55 |
| 35 | Uncharacterized protein                                   | Q2G0U0 | SAOUHSC_00437 | 159.75 |
| 36 | Sodium/proline symporter                                  | Q2FWY7 | putP          | 156.54 |
| 37 | ATP-dependent zinc metalloprotease FtsH                   | Q2G0R0 | ftsH          | 150.67 |
| 38 | Extracellular matrix protein-binding protein emp          | Q2G012 | emp           | 149.93 |
| 39 | Extramembranal protein                                    | Q2FZW3 | SAOUHSC_00872 | 148.89 |
| 40 | Uncharacterized protein                                   | Q2G082 | SAOUHSC_00738 | 144.94 |
| 41 | UPF0316 protein SAOUHSC_02131                             | Q2G2R9 | SAOUHSC_02131 | 144.40 |
| 42 | Glycine betaine transporter, putative                     | Q2FYT0 | SAOUHSC_01346 | 142.23 |
| 43 | Uncharacterized protein                                   | Q2G2W5 | SAOUHSC_02630 | 139.00 |
| 44 | Uncharacterized protein                                   | Q2FY36 | SAOUHSC_01630 | 133.75 |
| 45 | Uncharacterized protein                                   | Q2FWX0 | SAOUHSC_02151 | 129.50 |
| 46 | Uncharacterized protein                                   | Q2FVB9 | SAOUHSC_02815 | 122.39 |
| 47 | Na <sup>+</sup> /H <sup>+</sup> antiporter, putative      | Q2FVU1 | SAOUHSC_02601 | 118.89 |
| 48 | Glycerol-3-phosphate acyltransferase                      | Q2FYS6 | plsY          | 117.74 |
| 49 | TagB protein, putative                                    | Q2G1C2 | tarK          | 113.97 |
| 50 | Uncharacterized protein                                   | Q2FY58 | SAOUHSC_01607 | 111.91 |
| 51 | Sortase, putative                                         | Q2FV99 | SAOUHSC_02834 | 109.85 |
| 52 | Membrane protein insertase YidC                           | Q2FWG4 | yidC          | 107.03 |
| 53 | Uncharacterized lipoprotein SAOUHSC_00405                 | Q2G0W9 | SAOUHSC_00405 | 104.95 |
| 54 | Lytic regulatory protein, putative                        | Q2FWA8 | SAOUHSC_02390 | 104.53 |

|    |                                                   |        |               |        |
|----|---------------------------------------------------|--------|---------------|--------|
| 55 | Elastin-binding protein EbpS                      | Q2FYF1 | ebpS          | 104.44 |
| 56 | Protein translocase subunit SecY                  | O08387 | secY          | 103.90 |
| 57 | Protein-export membrane protein SecDF             | Q2FXT8 | secD          | 100.42 |
| 58 | Uncharacterized protein                           | Q2FYQ3 | SAOUHSC_01382 | 97.51  |
| 59 | Sodium:alanine symporter family protein, putative | Q2G2N5 | SAOUHSC_01354 | 96.54  |
| 60 | Monofunctional glycosyltransferase                | Q93Q23 | mgt           | 93.32  |
| 61 | PTS system EIIBC component SAOUHSC_00158          | Q2G1G5 | SAOUHSC_00158 | 93.07  |
| 62 | Large-conductance mechanosensitive channel        | P68805 | mscL          | 92.70  |
| 63 | Uncharacterized protein                           | Q2FXE7 | SAOUHSC_01902 | 90.89  |
| 64 | Sodium-dependent dicarboxylate transporter SdcS   | Q2FWY4 | sdcS          | 89.97  |
| 65 | O-acetyltransferase OatA                          | Q2FV54 | oatA          | 89.34  |
| 66 | Uncharacterized protein                           | Q2FUY8 | SAOUHSC_02957 | 87.34  |
| 67 | Na(+)/H(+) antiporter subunit G1                  | Q2G2H9 | mnhG1         | 79.83  |
| 68 | Uncharacterized protein                           | Q2G2Y4 | SAOUHSC_01918 | 78.83  |
| 69 | DNA topoisomerase 4 subunit A                     | Q2FYS4 | parC          | 75.31  |
| 70 | Lysostaphin resistance protein A                  | Q2FVT1 | lyrA          | 75.19  |
| 71 | Protein translocase subunit SecG                  | Q2G026 | SAOUHSC_00801 | 74.89  |
| 72 | Uncharacterized protein                           | Q2FV90 | SAOUHSC_02844 | 73.66  |
| 73 | Uncharacterized protein                           | Q2G0P9 | SAOUHSC_00501 | 71.72  |
| 74 | Uncharacterized protein                           | Q2FV15 | SAOUHSC_02928 | 70.34  |
| 75 | Uncharacterized protein                           | Q2G2S8 | SAOUHSC_01974 | 68.50  |
| 76 | Uncharacterized protein                           | Q2FXF0 | SAOUHSC_01899 | 67.38  |
| 77 | Protein translocase subunit SecA 1                | O06446 | secA1         | 65.48  |
| 78 | Uncharacterized protein                           | Q2G0U8 | SAOUHSC_00428 | 65.35  |
| 79 | Uncharacterized protein                           | Q2FZ85 | SAOUHSC_01155 | 63.36  |
| 80 | Signal transduction protein TRAP                  | Q2G2F3 | traP          | 62.85  |
| 81 | Fructose specific permease, putative              | Q2G239 | SAOUHSC_00708 | 62.40  |
| 82 | Uncharacterized protein                           | Q2G2E2 | SAOUHSC_00651 | 60.88  |
| 83 | Uncharacterized protein                           | Q2FVN4 | SAOUHSC_02668 | 59.39  |
| 84 | Uncharacterized protein                           | Q2FXI4 | SAOUHSC_01863 | 57.78  |
| 85 | Uncharacterized protein                           | Q2G1U8 | SAOUHSC_02690 | 55.48  |
| 86 | Lipase 1                                          | Q2FUU5 | lipA          | 55.27  |
| 87 | Cell shape-determining protein MreC               | Q2FXS6 | SAOUHSC_01759 | 54.69  |
| 88 | Uncharacterized protein                           | Q2G161 | SAOUHSC_00294 | 54.15  |
| 89 | Prolipoprotein diacylglycerol transferase         | Q2G044 | lgt           | 53.90  |
| 90 | Uncharacterized protein                           | Q2G242 | SAOUHSC_00508 | 53.35  |
| 91 | Zinc metalloprotease                              | Q2G1Z5 | SAOUHSC_01239 | 52.48  |
| 92 | Uncharacterized protein                           | Q2FZR7 | SAOUHSC_00923 | 52.27  |

|     |                                                                                                                     |        |               |       |
|-----|---------------------------------------------------------------------------------------------------------------------|--------|---------------|-------|
| 93  | ATP synthase subunit delta                                                                                          | Q2FWE7 | atpH          | 50.37 |
| 94  | 1-acyl-sn-glycerol-3-phosphate acyltransferases domain protein                                                      | Q2FXJ7 | SAOUHSC_01837 | 50.00 |
| 95  | Uncharacterized protein                                                                                             | Q2FVI5 | SAOUHSC_02725 | 48.65 |
| 96  | PTS system glucoside-specific EIICBA component                                                                      | Q2FV87 | glcB          | 47.97 |
| 97  | Uncharacterized protein                                                                                             | Q2G2G6 | SAOUHSC_01050 | 47.61 |
| 98  | Uncharacterized protein                                                                                             | Q2FZ64 | SAOUHSC_01187 | 46.78 |
| 99  | Uncharacterized protein                                                                                             | Q2FYL3 | SAOUHSC_01427 | 46.73 |
| 100 | Oligopeptide ABC transporter, substrate-binding protein, putative                                                   | Q2FZR3 | SAOUHSC_00927 | 46.07 |
| 101 | Amino acid ABC transporter-like protein, putative                                                                   | Q2FVI1 | SAOUHSC_02729 | 45.44 |
| 102 | Sodium, sulfate symporter, putative                                                                                 | Q2FUS2 | SAOUHSC_03030 | 45.41 |
| 103 | Multiple sugar-binding transport ATP-binding protein, putative                                                      | Q2G1F0 | SAOUHSC_00175 | 44.62 |
| 104 | Uncharacterized protein                                                                                             | Q2FVK0 | SAOUHSC_02711 | 42.49 |
| 105 | Glycerophosphoryl diester phosphodiesterase, putative                                                               | Q2FZF9 | SAOUHSC_01071 | 41.88 |
| 106 | Uncharacterized protein                                                                                             | Q2FXN2 | SAOUHSC_01803 | 41.86 |
| 107 | Uncharacterized protein                                                                                             | Q2FXF4 | SAOUHSC_01895 | 41.78 |
| 108 | UDP-N-acetylglucosamine--N-acetylmuramyl-(pentapeptide) pyrophosphoryl-undecaprenol N-acetylglucosamine transferase | Q2FYL5 | murG          | 40.91 |
| 109 | Methionine import ATP-binding protein MetN 2                                                                        | Q2FZZ2 | metN2         | 40.48 |
| 110 | Uncharacterized protein                                                                                             | Q2FX11 | SAOUHSC_02096 | 39.67 |
| 111 | Uncharacterized protein                                                                                             | Q2FVS2 | SAOUHSC_02620 | 39.58 |
| 112 | Uncharacterized protein                                                                                             | Q2FVY7 | SAOUHSC_01317 | 38.14 |
| 113 | ATP synthase epsilon chain                                                                                          | Q2FWF1 | atpC          | 37.76 |
| 114 | Uncharacterized protein                                                                                             | Q2FZ12 | SAOUHSC_01259 | 37.27 |
| 115 | Uncharacterized protein                                                                                             | Q2G0B5 | SAOUHSC_00690 | 36.35 |
| 116 | Uncharacterized protein                                                                                             | Q2FV65 | SAOUHSC_02872 | 33.84 |
| 117 | Putative antiporter subunit mnhD2                                                                                   | Q2G212 | mnhD2         | 32.96 |
| 118 | Uncharacterized protein                                                                                             | Q2G2V7 | SAOUHSC_02008 | 32.89 |
| 119 | Uncharacterized protein                                                                                             | Q2G0R4 | SAOUHSC_00482 | 32.05 |
| 120 | Ribonuclease Y                                                                                                      | Q2FZ08 | my            | 31.96 |
| 121 | Phosphatidate cytidyltransferase                                                                                    | Q2G1Z6 | SAOUHSC_01238 | 31.44 |
| 122 | Cytochrome d ubiquinol oxidase, subunit I, putative                                                                 | Q2FZH3 | SAOUHSC_01031 | 31.14 |
| 123 | Uncharacterized protein                                                                                             | Q2FVF2 | SAOUHSC_02762 | 30.32 |
| 124 | Quinolone resistance protein NorB                                                                                   | Q2FYJ5 | norB          | 29.56 |
| 125 | Histidine protein kinase SaeS                                                                                       | Q2G2U1 | saeS          | 28.54 |
| 126 | Acetyl-CoA acetyltransferase, putative                                                                              | Q2G1D0 | SAOUHSC_00195 | 27.65 |

|     |                                                                                        |        |               |       |
|-----|----------------------------------------------------------------------------------------|--------|---------------|-------|
| 127 | Uncharacterized protein                                                                | Q2G245 | SAOUHSC_01854 | 27.28 |
| 128 | Spermidine/putrescine import ATP-binding protein PotA                                  | Q2G2A7 | potA          | 26.50 |
| 129 | Uncharacterized protein                                                                | Q2G0Z4 | SAOUHSC_00367 | 25.55 |
| 130 | Uncharacterized protein                                                                | Q2FVZ5 | SAOUHSC_02525 | 25.16 |
| 131 | Uncharacterized protein                                                                | Q2G074 | SAOUHSC_00746 | 24.96 |
| 132 | Glycerol-3-phosphate transporter                                                       | Q2G138 | SAOUHSC_00317 | 24.71 |
| 133 | Signal peptidase I                                                                     | Q2FZT8 | SAOUHSC_00902 | 24.21 |
| 134 | Rhomboid family protein                                                                | Q2FY24 | SAOUHSC_01649 | 22.14 |
| 135 | Uncharacterized protein                                                                | Q2G185 | essB          | 21.92 |
| 136 | Uncharacterized protein                                                                | Q2FW92 | dacA          | 21.15 |
| 137 | Dihydroorotate dehydrogenase (quinone)                                                 | Q2FV30 | SAOUHSC_02909 | 20.91 |
| 138 | PTS system, glucose-specific IIBC component, putative                                  | Q2G219 | SAOUHSC_00209 | 20.85 |
| 139 | Uncharacterized protein                                                                | Q2G134 | SAOUHSC_00322 | 20.39 |
| 140 | Uncharacterized protein                                                                | Q2FZ00 | SAOUHSC_01271 | 20.18 |
| 141 | Regulatory protein MsrR                                                                | Q7BHL7 | msrR          | 19.55 |
| 142 | Uncharacterized protein                                                                | Q2FZQ4 | SAOUHSC_00946 | 19.49 |
| 143 | Na(+)/H(+) antiporter subunit D1                                                       | Q2G2H7 | mnhD1         | 19.44 |
| 144 | Uncharacterized protein                                                                | Q2FWX2 | SAOUHSC_02149 | 19.21 |
| 145 | Uncharacterized protein                                                                | Q2FZR6 | SAOUHSC_00924 | 18.41 |
| 146 | Uncharacterized protein                                                                | Q2G1M2 | SAOUHSC_00085 | 18.38 |
| 147 | Transporter, putative                                                                  | Q2FVE1 | SAOUHSC_02773 | 17.76 |
| 148 | GTPase Era                                                                             | Q2FY06 | era           | 17.39 |
| 149 | Penicillin-binding protein 1                                                           | Q2FZ94 | SAOUHSC_01145 | 17.10 |
| 150 | Uncharacterized protein                                                                | Q2FVV1 | SAOUHSC_02590 | 17.07 |
| 151 | CDP-diacylglycerol--glycerol-3-phosphate 3-phosphatidyltransferase                     | Q2FZ11 | SAOUHSC_01260 | 15.72 |
| 152 | Drug resistance transporter, EmrB/QacA subfamily, putative                             | Q2G2W1 | SAOUHSC_02629 | 15.47 |
| 153 | Uncharacterized protein                                                                | Q2G2T6 | SAOUHSC_00015 | 15.41 |
| 154 | Cytochrome d ubiquinol oxidase, subunit II, putative                                   | Q2FZH2 | SAOUHSC_01032 | 15.37 |
| 155 | Uncharacterized protein                                                                | Q2FVS4 | SAOUHSC_02618 | 15.07 |
| 156 | Uncharacterized protein                                                                | Q2FXZ8 | SAOUHSC_01677 | 14.99 |
| 157 | Sodium/glutamate symporter                                                             | Q2FVS0 | SAOUHSC_02622 | 14.42 |
| 158 | Membrane spanning protein, putative                                                    | Q2FVB3 | SAOUHSC_02821 | 14.21 |
| 159 | Teichoic acids export ATP-binding protein TagH                                         | Q2G2L1 | tagH          | 12.91 |
| 160 | Hydrolase, alpha/beta fold family domain protein                                       | Q2FYZ3 | SAOUHSC_01279 | 12.61 |
| 161 | Spermidine/putrescine ABC transporter, spermidine/putrescine-binding protein, putative | Q2G2A8 | SAOUHSC_01049 | 12.45 |

|     |                                                                  |        |               |       |
|-----|------------------------------------------------------------------|--------|---------------|-------|
| 162 | Uncharacterized protein                                          | Q2FW93 | SAOUHSC_02406 | 12.31 |
| 163 | Serine protease HtrA-like                                        | Q2FZP2 | SAOUHSC_00958 | 11.87 |
| 164 | Copper-exporting P-type ATPase A                                 | Q2FV64 | copA          | 10.85 |
| 165 | Teichoic acid biosynthesis protein F, putative                   | Q2G1C1 | tarF          | 10.51 |
| 166 | Phosphate transport system permease protein PstA                 | Q2FYP9 | SAOUHSC_01386 | 10.41 |
| 167 | Uncharacterized protein                                          | Q2FWH2 | SAOUHSC_02319 | 10.12 |
| 168 | Uncharacterized protein                                          | Q2G2E5 | SAOUHSC_00647 | 9.53  |
| 169 | Uncharacterized protein                                          | Q2G2Y3 | SAOUHSC_01919 | 9.35  |
| 170 | Uncharacterized protein                                          | Q2FUS5 | SAOUHSC_03026 | 9.15  |
| 171 | Sensor protein SrrB                                              | Q2FY80 | srrB          | 8.20  |
| 172 | Undecaprenyl-diphosphatase                                       | Q2G0B4 | uppP          | 8.10  |
| 173 | Penicillin-binding protein 3                                     | Q2FY21 | SAOUHSC_01652 | 7.02  |
| 174 | PTS system, mannitol-specific component, putative                | Q2FW99 | SAOUHSC_02400 | 6.83  |
| 175 | Uncharacterized protein                                          | Q2G1R0 | SAOUHSC_00042 | 6.74  |
| 176 | Uncharacterized protein                                          | Q2G1P4 | SAOUHSC_00060 | 5.58  |
| 177 | Uncharacterized protein                                          | Q2FX10 | SAOUHSC_02097 | 5.51  |
| 178 | Lipoteichoic acid synthase                                       | Q2G093 | ltaS          | 4.75  |
| 179 | Uncharacterized protein                                          | Q2FY00 | SAOUHSC_01675 | 4.41  |
| 180 | Phosphonate ABC transporter, substrate-binding protein, putative | Q2G1L7 | SAOUHSC_00105 | 4.23  |
| 181 | Uncharacterized protein                                          | Q2FXS4 | SAOUHSC_01761 | 3.80  |
| 182 | Uncharacterized protein                                          | Q2G2H3 | SAOUHSC_02009 | 3.22  |
| 183 | Uncharacterized protein                                          | Q2FZ18 | SAOUHSC_01253 | 3.06  |
| 184 | Membrane protein, putative                                       | Q2G1C5 | SAOUHSC_00200 | 2.93  |
| 185 | Amino acid ABC transporter, permease protein, putative           | Q2G088 | SAOUHSC_00732 | 2.91  |
| 186 | Polysaccharide biosynthesis protein, putative                    | Q2FXH6 | SAOUHSC_01871 | 2.53  |
| 187 | Cardiolipin synthase                                             | Q2FWG8 | SAOUHSC_02323 | 2.48  |
| 188 | Cell division protein DivIB                                      | Q2FZ91 | divIB         | 2.38  |
| 189 | Pts system, lactose-specific IIBC component, putative            | Q2G2D4 | SAOUHSC_02450 | 2.31  |
| 190 | Extracellular matrix-binding protein ebh                         | Q2FYJ6 | ebh           | 1.87  |
| 191 | Elongation factor 4                                              | Q2FXY7 | lepA          | 1.83  |
| 192 | Uncharacterized protein                                          | Q2FWI3 | SAOUHSC_02308 | 1.50  |
| 193 | Alanine dehydrogenase 2                                          | Q2FXL7 | ald2          | 1.42  |
| 194 | Uncharacterized protein                                          | Q2G188 | esaA          | 0.64  |
| 195 | Protein translocase subunit SecA 2                               | Q2FUW6 | secA2         | 0.64  |

### *Cytoplasm*

|    |                                                                                                   |        |               |         |
|----|---------------------------------------------------------------------------------------------------|--------|---------------|---------|
| 1  | Pyruvate dehydrogenase complex, E1 component, pyruvate dehydrogenase beta subunit, putative       | Q2G2A5 | SAOUHSC_01041 | 7139.57 |
| 2  | Dihydrolipoamide S-acetyltransferase component of pyruvate dehydrogenase complex E2, putative     | Q2G2A4 | SAOUHSC_01042 | 6982.71 |
| 3  | Pyruvate dehydrogenase complex, E1 component, alpha subunit, putative                             | Q2FZG4 | SAOUHSC_01040 | 6003.62 |
| 4  | Dihydrolipoyl dehydrogenase                                                                       | Q2G2A3 | SAOUHSC_01043 | 5493.42 |
| 5  | Elongation factor Tu                                                                              | Q2G0N0 | tuf           | 2048.06 |
| 6  | Dihydrolipoyllysine-residue succinyltransferase component of 2-oxoglutarate dehydrogenase complex | Q2FYM2 | odhB          | 1881.89 |
| 7  | 50S ribosomal protein L1                                                                          | Q2G0P0 | rplA          | 1860.73 |
| 8  | 50S ribosomal protein L21                                                                         | Q2FXS8 | rplU          | 1380.56 |
| 9  | 50S ribosomal protein L16                                                                         | Q2FW13 | rplP          | 1222.07 |
| 10 | 30S ribosomal protein S11                                                                         | Q2FW31 | rpsK          | 1046.93 |
| 11 | 30S ribosomal protein S4                                                                          | Q2FXX6 | rpsD          | 834.14  |
| 12 | 50S ribosomal protein L22                                                                         | Q2FW11 | rplV          | 774.25  |
| 13 | 50S ribosomal protein L2                                                                          | P60430 | rplB          | 764.74  |
| 14 | 50S ribosomal protein L19                                                                         | Q2FZ42 | rplS          | 739.30  |
| 15 | 30S ribosomal protein S3                                                                          | Q2FW12 | rpsC          | 710.15  |
| 16 | DNA-directed RNA polymerase subunit beta'                                                         | Q2G0N5 | rpoC          | 621.39  |
| 17 | Uncharacterized protein                                                                           | Q2FVB4 | SAOUHSC_02820 | 579.96  |
| 18 | Probable malate:quinone oxidoreductase                                                            | Q2FV16 | mqo           | 567.87  |
| 19 | 30S ribosomal protein S5                                                                          | Q2FW23 | rpsE          | 564.05  |
| 20 | Glutamate dehydrogenase                                                                           | Q2FZU5 | SAOUHSC_00895 | 546.35  |
| 21 | 2-oxoglutarate dehydrogenase E1 component                                                         | Q2FYM1 | odhA          | 522.46  |
| 22 | 50S ribosomal protein L4                                                                          | Q2FW07 | rplD          | 503.19  |
| 23 | 50S ribosomal protein L20                                                                         | Q2FXQ1 | rplT          | 479.47  |
| 24 | 50S ribosomal protein L15                                                                         | P0A0F8 | rplO          | 476.37  |
| 25 | Aerobic glycerol-3-phosphate dehydrogenase                                                        | Q2FYZ4 | glpD          | 471.35  |
| 26 | DNA-directed RNA polymerase subunit beta                                                          | P47768 | rpoB          | 468.87  |
| 27 | 30S ribosomal protein S2                                                                          | Q2FZ25 | rpsB          | 460.35  |
| 28 | Cell division protein FtsZ                                                                        | Q2FZ89 | ftsZ          | 412.33  |
| 29 | Uncharacterized protein                                                                           | Q2G2L2 | SAOUHSC_00637 | 366.98  |
| 30 | 30S ribosomal protein S9                                                                          | Q2FW39 | rpsI          | 361.78  |
| 31 | Putative universal stress protein SAOUHSC_01819                                                   | Q2FXL6 | SAOUHSC_01819 | 343.50  |
| 32 | Probable glycine dehydrogenase (decarboxylating) subunit 1                                        | Q2FY34 | gcvPA         | 330.28  |
| 33 | NADH dehydrogenase-like protein SAOUHSC_00878                                                     | Q2FZV7 | SAOUHSC_00878 | 323.25  |
| 34 | 30S ribosomal protein S12                                                                         | P0A0H0 | rpsL          | 283.61  |

|    |                                                            |        |               |        |
|----|------------------------------------------------------------|--------|---------------|--------|
| 35 | Elongation factor G                                        | Q2G0N1 | fusA          | 274.61 |
| 36 | Enolase                                                    | Q2G028 | eno           | 272.29 |
| 37 | DEAD-box ATP-dependent RNA helicase CshA                   | Q2FWH5 | cshA          | 247.32 |
| 38 | 50S ribosomal protein L5                                   | Q2FW18 | rplE          | 247.31 |
| 39 | 30S ribosomal protein S7                                   | P48940 | rpsG          | 241.90 |
| 40 | Ribonuclease J 1                                           | Q2FZG9 | rnj1          | 241.40 |
| 41 | Glyceraldehyde-3-phosphate dehydrogenase                   | Q2G032 | SAOUHSC_00795 | 237.61 |
| 42 | 50S ribosomal protein L10                                  | Q2G0N9 | rplJ          | 236.55 |
| 43 | Glutamine synthetase                                       | Q2FYY6 | SAOUHSC_01287 | 235.00 |
| 44 | Pyruvate kinase                                            | Q2FXM9 | pyk           | 228.14 |
| 45 | Alkyl hydroperoxide reductase subunit C                    | P0A0B7 | ahpC          | 202.08 |
| 46 | Probable glycine dehydrogenase (decarboxylating) subunit 2 | Q2FY35 | gcvPB         | 201.69 |
| 47 | UPF0637 protein SAOUHSC_01054                              | Q2G2G7 | SAOUHSC_01054 | 193.94 |
| 48 | 3-hydroxyacyl-[acyl-carrier-protein] dehydratase FabZ      | Q2FWF5 | fabZ          | 191.00 |
| 49 | Bacterial non-heme ferritin                                | Q2FWZ8 | ftnA          | 187.16 |
| 50 | DNA-binding protein HU, putative                           | Q2FYG2 | SAOUHSC_01490 | 179.25 |
| 51 | Uncharacterized protein                                    | Q2FXM1 | SAOUHSC_01814 | 178.02 |
| 52 | 50S ribosomal protein L6                                   | Q2FW21 | rplF          | 168.63 |
| 53 | DEAD-box ATP-dependent RNA helicase CshB                   | Q2FY15 | cshB          | 164.22 |
| 54 | 1,4-dihydroxy-2-naphthoyl-CoA synthase                     | Q2FZL5 | menB          | 162.81 |
| 55 | Putative aldehyde dehydrogenase AldA                       | Q2G1J0 | aldA          | 161.75 |
| 56 | Pyridoxal 5'-phosphate synthase subunit PdxS               | Q2G0Q1 | pdxS          | 160.29 |
| 57 | Asparagine--tRNA ligase                                    | Q2FYH6 | asnS          | 157.55 |
| 58 | Uncharacterized protein                                    | Q2G1B7 | SAOUHSC_00228 | 152.25 |
| 59 | Uncharacterized protein                                    | Q2FWB7 | SAOUHSC_02381 | 145.81 |
| 60 | Inosine-5'-monophosphate dehydrogenase                     | Q2G0Y7 | guaB          | 145.05 |
| 61 | DNA-directed RNA polymerase subunit alpha                  | Q2FW32 | rpoA          | 142.49 |
| 62 | Glycine--tRNA ligase                                       | Q2FY08 | glyQS         | 140.42 |
| 63 | Glutamyl-tRNA(Gln) amidotransferase subunit A              | Q2FWY9 | gatA          | 138.84 |
| 64 | Ribose-phosphate pyrophosphokinase                         | Q2G0S2 | prs           | 134.13 |
| 65 | Ribonuclease J 2                                           | Q2FZ19 | rnj2          | 130.76 |
| 66 | 50S ribosomal protein L3                                   | Q2FW06 | rplC          | 127.02 |
| 67 | Signal recognition particle protein                        | Q2FZ46 | ffh           | 126.41 |
| 68 | Enoyl-[acyl-carrier-protein] reductase [NADPH] FabI        | Q2FZQ3 | fabI          | 126.11 |
| 69 | Menaquinone biosynthesis methyltransferase, putative       | Q2FYG5 | SAOUHSC_01487 | 125.17 |
| 70 | Uncharacterized protein                                    | Q2G1C8 | SAOUHSC_00197 | 115.64 |

|     |                                                             |        |               |        |
|-----|-------------------------------------------------------------|--------|---------------|--------|
| 71  | Translation initiation factor IF-2                          | Q2G2D0 | infB          | 115.45 |
| 72  | Probable malate:quinone oxidoreductase                      | Q2FVQ5 | mqo           | 115.17 |
| 73  | 30S ribosomal protein S13                                   | Q2FW30 | rpsM          | 114.58 |
| 74  | Uncharacterized protein                                     | Q2FVW3 | SAOUHSC_02579 | 111.22 |
| 75  | Formate--tetrahydrofolate ligase                            | Q2G296 | fhs           | 110.02 |
| 76  | 50S ribosomal protein L14                                   | Q2FW16 | rplN          | 109.77 |
| 77  | HTH-type transcriptional regulator SarS                     | Q2G1N7 | sarS          | 105.20 |
| 78  | ABC transporter, ATP-binding protein, putative              | Q2FWW9 | SAOUHSC_02152 | 99.55  |
| 79  | Isocitrate dehydrogenase [NADP]                             | Q2FXN4 | SAOUHSC_01801 | 96.76  |
| 80  | Glycerol kinase                                             | Q2FYZ5 | glpK          | 93.55  |
| 81  | Translation initiation factor IF-3                          | Q2FXP9 | infC          | 92.96  |
| 82  | Uncharacterized protein                                     | Q2G2L3 | tarA          | 92.05  |
| 83  | Uncharacterized protein                                     | Q2FVL6 | SAOUHSC_02695 | 90.62  |
| 84  | Uncharacterized protein                                     | Q2FZ59 | SAOUHSC_01192 | 88.18  |
| 85  | Amino acid ABC transporter, ATP-binding protein, putative   | Q2FVL4 | SAOUHSC_02697 | 87.57  |
| 86  | Proline--tRNA ligase                                        | Q2G1Z4 | proS          | 86.79  |
| 87  | Chaperone protein DnaK                                      | Q2FXZ2 | dnaK          | 81.67  |
| 88  | 1-pyrroline-5-carboxylate dehydrogenase                     | Q2FV67 | rocA          | 78.08  |
| 89  | 30S ribosomal protein S8                                    | Q2FW20 | rpsH          | 74.98  |
| 90  | 50S ribosomal protein L25                                   | Q2G0S0 | rplY          | 74.82  |
| 91  | Acetate kinase                                              | Q2FXL5 | ackA          | 73.76  |
| 92  | Uncharacterized protein                                     | Q2FY81 | SAOUHSC_01584 | 72.60  |
| 93  | Lipid II:glycine glycytransferase                           | Q2FVZ4 | femX          | 72.60  |
| 94  | GTP-sensing transcriptional pleiotropic repressor CodY      | Q2FZ27 | codY          | 71.52  |
| 95  | Uncharacterized protein                                     | Q2G2S7 | SAOUHSC_01975 | 70.98  |
| 96  | 50S ribosomal protein L13                                   | Q2FW38 | rplM          | 69.80  |
| 97  | Serine hydroxymethyltransferase                             | Q2FWE5 | glyA          | 69.79  |
| 98  | Pur operon repressor                                        | Q2G0S7 | SAOUHSC_00467 | 69.57  |
| 99  | Probable DNA-directed RNA polymerase subunit delta          | Q2FWD0 | rpoE          | 68.95  |
| 100 | Uncharacterized protein                                     | Q2FZR5 | SAOUHSC_00925 | 68.31  |
| 101 | Aminoacyltransferase FemA                                   | Q2FYR2 | femA          | 67.53  |
| 102 | Protein translocase subunit SecA 1                          | O06446 | secA1         | 65.48  |
| 103 | Oligopeptide ABC transporter, ATP-binding protein, putative | Q2FZR4 | SAOUHSC_00926 | 64.78  |
| 104 | Succinyl-CoA ligase [ADP-forming] subunit alpha             | Q2FZ36 | sucD          | 64.23  |
| 105 | Uncharacterized protein                                     | Q2FV35 | SAOUHSC_02904 | 62.61  |
| 106 | Succinyl-CoA ligase [ADP-forming] subunit beta              | Q2FZ37 | sucC          | 61.95  |



|     |                                                                    |        |               |       |
|-----|--------------------------------------------------------------------|--------|---------------|-------|
| 107 | Iron compound ABC transporter, substrate-binding protein, putative | Q2G0F6 | SAOUHSC_00613 | 61.17 |
| 108 | Ornithine aminotransferase                                         | Q2FZU6 | rocD          | 59.15 |
| 109 | CTP synthase                                                       | Q2FWD1 | pyrG          | 57.72 |
| 110 | 30S ribosomal protein S19                                          | Q2FW10 | rpsS          | 57.66 |
| 111 | Uncharacterized protein                                            | Q2FYN0 | SAOUHSC_01405 | 56.27 |
| 112 | Glycosyl transferase, group 1                                      | Q2FZM6 | SAOUHSC_00974 | 55.98 |
| 113 | Aminomethyltransferase                                             | Q2FY33 | gcvT          | 52.75 |
| 114 | 30S ribosomal protein S15                                          | Q2G2Q1 | rpsO          | 52.45 |
| 115 | ABC transporter, ATP-binding protein, putative                     | Q2G1V4 | SAOUHSC_00333 | 50.48 |
| 116 | Adapter protein MecA                                               | Q2G1U5 | mecA          | 49.55 |
| 117 | 30S ribosomal protein S18                                          | Q2G111 | rpsR          | 48.17 |
| 118 | Uncharacterized protein                                            | Q2FVW0 | SAOUHSC_02581 | 46.39 |
| 119 | Uncharacterized protein                                            | Q2G2W3 | SAOUHSC_02627 | 44.78 |
| 120 | Uncharacterized protein                                            | Q2FX98 | SAOUHSC_01979 | 43.21 |
| 121 | Uncharacterized protein                                            | Q2FWD3 | SAOUHSC_02366 | 40.96 |
| 122 | ABC transporter domain protein                                     | Q2G089 | SAOUHSC_00731 | 40.38 |
| 123 | Uncharacterized protein                                            | Q2FVS3 | SAOUHSC_02619 | 38.84 |
| 124 | Uncharacterized protein                                            | Q2FXX9 | SAOUHSC_01701 | 37.99 |
| 125 | 50S ribosomal protein L18                                          | Q2FW22 | rplR          | 37.41 |
| 126 | Ribosome hibernation promotion factor                              | Q2G055 | hpf           | 36.97 |
| 127 | Holliday junction ATP-dependent DNA helicase RuvA                  | Q2FXT3 | ruvA          | 35.78 |
| 128 | 50S ribosomal protein L7/L12                                       | P48860 | rplL          | 35.12 |
| 129 | Acetyl-CoA carboxylase, biotin carboxylase, putative               | Q2FXX1 | SAOUHSC_01709 | 34.74 |
| 130 | Glutamate synthase alpha subunit, putative                         | Q2FVF4 | SAOUHSC_02760 | 34.56 |
| 131 | 50S ribosomal protein L23                                          | Q2FW08 | rplW          | 34.47 |
| 132 | Aspartyl/glutamyl-tRNA(Asn/Gln) amidotransferase subunit B         | Q2FWZ0 | gatB          | 34.35 |
| 133 | Transcription termination factor Rho                               | Q2FWD7 | rho           | 34.04 |
| 134 | Uncharacterized protein                                            | Q2FXW9 | SAOUHSC_01711 | 33.91 |
| 135 | Peptide methionine sulfoxide reductase MsrB                        | P0A088 | msrB          | 33.60 |
| 136 | Glutamine--fructose-6-phosphate aminotransferase [isomerizing]     | Q2FWA0 | glmS          | 33.43 |
| 137 | Catalase                                                           | Q2FYU7 | katA          | 32.68 |
| 138 | HTH-type transcriptional regulator SarR                            | Q9F0R1 | sarR          | 32.57 |
| 139 | Formate acetyltransferase                                          | Q2G1D8 | pflB          | 32.50 |
| 140 | Putative formate dehydrogenase<br>SAOUHSC_02582                    | Q2FVV9 | SAOUHSC_02582 | 32.36 |
| 141 | Pyrimidine-nucleoside phosphorylase                                | Q2FWC1 | pdp           | 31.97 |
| 142 | Fructose-bisphosphate aldolase class 1                             | Q2FV17 | fda           | 30.20 |

|     |                                                                                            |        |               |       |
|-----|--------------------------------------------------------------------------------------------|--------|---------------|-------|
| 143 | Uncharacterized protein                                                                    | Q2G0F3 | SAOUHSC_00616 | 30.06 |
| 144 | Ferredoxin, putative                                                                       | Q2FYE8 | SAOUHSC_01504 | 28.94 |
| 145 | Uncharacterized protein                                                                    | Q2G0D6 | SAOUHSC_00669 | 28.17 |
| 146 | Uncharacterized protein                                                                    | Q2FY44 | SAOUHSC_01622 | 28.08 |
| 147 | Uracil phosphoribosyltransferase                                                           | Q2FWE6 | upp           | 27.98 |
| 148 | Uncharacterized protein                                                                    | Q2FZM7 | SAOUHSC_00973 | 27.93 |
| 149 | Conserved virulence factor B                                                               | Q2FYP3 | cvfB          | 27.02 |
| 150 | 3-oxoacyl-(Acyl-carrier-protein) reductase, putative                                       | Q2FZ53 | SAOUHSC_01199 | 25.71 |
| 151 | Pyruvate oxidase, putative                                                                 | Q2FV86 | SAOUHSC_02849 | 25.57 |
| 152 | Lysine--tRNA ligase                                                                        | Q2G0Q3 | lysS          | 25.33 |
| 153 | HTH-type transcriptional regulator SarX                                                    | Q2G0D1 | sarX          | 25.11 |
| 154 | Uncharacterized protein                                                                    | Q2FZW0 | SAOUHSC_00875 | 24.71 |
| 155 | Ribonucleoside-diphosphate reductase                                                       | Q2G078 | SAOUHSC_00742 | 24.47 |
| 156 | Phosphate acyltransferase                                                                  | Q2FZ55 | plsX          | 23.78 |
| 157 | Nucleoside diphosphate kinase                                                              | Q2FYG7 | ndk           | 22.96 |
| 158 | RNA polymerase sigma factor SigA                                                           | P0A0J0 | sigA          | 22.93 |
| 159 | 30S ribosomal protein S1, putative                                                         | Q2FYF9 | SAOUHSC_01493 | 22.12 |
| 160 | 2-oxoisovalerate dehydrogenase, E2 component, dihydrolipoamide acetyltransferase, putative | Q2FY54 | SAOUHSC_01611 | 21.31 |
| 161 | Dihydroxy-acid dehydratase                                                                 | Q2FWK7 | ilvD          | 20.65 |
| 162 | Protein RecA                                                                               | Q2FZ09 | recA          | 20.15 |
| 163 | Uncharacterized protein                                                                    | Q2FYK7 | SAOUHSC_01433 | 19.57 |
| 164 | Ribosomal RNA small subunit methyltransferase H                                            | P60393 | rsmH          | 18.46 |
| 165 | HMG-CoA synthase, putative                                                                 | Q2FV76 | SAOUHSC_02860 | 18.38 |
| 166 | Aminoacyltransferase FemB                                                                  | Q2FYR1 | femB          | 18.30 |
| 167 | Uncharacterized protein                                                                    | Q2FZH1 | SAOUHSC_01034 | 18.21 |
| 168 | ATP-dependent Clp protease ATP-binding subunit ClpX                                        | Q2FXQ7 | clpX          | 17.98 |
| 169 | Aconitate hydratase                                                                        | Q2FYS9 | SAOUHSC_01347 | 17.90 |
| 170 | Bifunctional protein FolD                                                                  | Q2FZJ6 | folD          | 17.90 |
| 171 | GTPase Era                                                                                 | Q2FY06 | era           | 17.39 |
| 172 | Elongation factor Ts                                                                       | Q2FZ23 | tsf           | 16.64 |
| 173 | GTPase Obg                                                                                 | Q2FXT1 | obg           | 16.63 |
| 174 | Uncharacterized protein                                                                    | Q2FXH5 | SAOUHSC_01872 | 16.59 |
| 175 | Superoxide dismutase [Mn] 1                                                                | P0A0J3 | sodA          | 16.45 |
| 176 | UDP-N-acetylglucosamine 1-carboxyvinyltransferase                                          | Q2FWF4 | murA          | 16.04 |
| 177 | Iron-sulfur cluster carrier protein                                                        | Q2FW86 | SAOUHSC_02417 | 15.34 |
| 178 | Trigger factor                                                                             | Q2FXQ6 | tig           | 14.55 |

|     |                                                                 |        |               |       |
|-----|-----------------------------------------------------------------|--------|---------------|-------|
| 179 | Uncharacterized protein                                         | Q2FVV6 | SAOUHSC_02585 | 13.64 |
| 180 | Uncharacterized protein                                         | Q2G1C9 | SAOUHSC_00196 | 13.43 |
| 181 | Aldehyde dehydrogenase                                          | Q2FWX9 | SAOUHSC_02142 | 13.42 |
| 182 | Ribosomal RNA small subunit methyltransferase B                 | Q2FZ67 | SAOUHSC_01184 | 12.82 |
| 183 | Glucose-6-phosphate isomerase                                   | Q2FZU0 | pgi           | 12.67 |
| 184 | Acetyl-coenzyme A carboxylase carboxyl transferase subunit beta | Q2FXM6 | accD          | 12.44 |
| 185 | Uridylate kinase                                                | Q2FZ22 | pyrH          | 12.41 |
| 186 | Cysteine synthase                                               | Q2G0Q8 | SAOUHSC_00488 | 12.10 |
| 187 | Glyceraldehyde-3-phosphate dehydrogenase                        | Q2FXP2 | SAOUHSC_01794 | 10.54 |
| 188 | Uncharacterized protein                                         | Q2G0Z2 | SAOUHSC_00369 | 10.35 |
| 189 | Hypoxanthine phosphoribosyltransferase                          | Q2G0R1 | SAOUHSC_00485 | 10.04 |
| 190 | Catabolite control protein A                                    | Q2G295 | SAOUHSC_01850 | 9.47  |
| 191 | Uncharacterized protein                                         | Q2FXD3 | SAOUHSC_01930 | 9.41  |
| 192 | Ribonucleotide-disphosphate reductase beta chain, putative      | Q2G077 | SAOUHSC_00743 | 9.37  |
| 193 | Elongation factor P                                             | Q2FY41 | efp           | 9.30  |
| 194 | 60 kDa chaperonin                                               | Q2FWN4 | groL          | 9.21  |
| 195 | 3-hydroxy-3-methylglutaryl coenzyme A reductase                 | Q2FV77 | SAOUHSC_02859 | 8.78  |
| 196 | DNA topoisomerase 4 subunit B                                   | Q2FYS5 | parE          | 8.70  |
| 197 | Uncharacterized protein                                         | Q2FX90 | SAOUHSC_01987 | 8.33  |
| 198 | Ribonuclease R                                                  | Q2G024 | rnr           | 8.27  |
| 199 | S1 RNA binding domain protein                                   | Q2FWJ5 | SAOUHSC_02297 | 8.26  |
| 200 | DNA topoisomerase 1                                             | Q2FZ32 | topA          | 7.89  |
| 201 | ABC transporter, ATP-binding protein, putative                  | Q2G2F1 | SAOUHSC_01967 | 7.32  |
| 202 | Uncharacterized protein                                         | Q2G0M8 | SAOUHSC_00532 | 7.30  |
| 203 | TelA-like protein SAOUHSC_01408                                 | Q2FYM7 | SAOUHSC_01408 | 7.23  |
| 204 | HTH-type transcriptional regulator rot                          | Q9RFJ6 | rot           | 7.21  |
| 205 | Alanine--tRNA ligase                                            | Q2FXV9 | alaS          | 7.08  |
| 206 | 3-oxoacyl-[acyl-carrier-protein] synthase 2                     | Q2FZR9 | SAOUHSC_00921 | 6.76  |
| 207 | L-lactate dehydrogenase 2                                       | Q2G1Y5 | ldh2          | 6.74  |
| 208 | Leucine aminopeptidase 2, chloroplastic                         | Q2FZV6 | SAOUHSC_00879 | 6.11  |
| 209 | Type I restriction-modification system, M subunit               | Q2FXD0 | SAOUHSC_01933 | 6.02  |
| 210 | Uncharacterized protein                                         | Q2FXY2 | SAOUHSC_01698 | 5.99  |
| 211 | Uncharacterized protein                                         | Q2G0L2 | SAOUHSC_00548 | 5.48  |
| 212 | Uncharacterized protein                                         | Q2FXA7 | SAOUHSC_01958 | 5.40  |
| 213 | ATP-dependent 6-phosphofructokinase                             | Q2FXM8 | pfkA          | 5.13  |
| 214 | Uncharacterized protein                                         | Q2G2J9 | SAOUHSC_01412 | 4.86  |

|     |                                                                                |        |               |      |
|-----|--------------------------------------------------------------------------------|--------|---------------|------|
| 215 | Uncharacterized protein                                                        | Q2FWC6 | SAOUHSC_02372 | 4.80 |
| 216 | Urocanate hydratase                                                            | Q2FVT5 | hutU          | 4.58 |
| 217 | DNA gyrase subunit A                                                           | Q2G2Q0 | gyrA          | 4.40 |
| 218 | Heptaprenyl diphosphate syntase component II, putative                         | Q2FYG6 | SAOUHSC_01486 | 4.39 |
| 219 | DNA polymerase III, gamma and tau subunits, putative                           | Q2G0T5 | dnaX          | 3.78 |
| 220 | Oxygen-dependent choline dehydrogenase                                         | Q2FV11 | betA          | 3.38 |
| 221 | Uncharacterized protein                                                        | Q2FXI9 | SAOUHSC_01857 | 3.04 |
| 222 | Ribosome-binding ATPase YchF                                                   | Q2G115 | ychF          | 2.91 |
| 223 | Fructose-1,6-bisphosphatase class 3                                            | Q2FVB2 | fbp           | 2.84 |
| 224 | Polyribonucleotide nucleotidyltransferase                                      | Q2FZ20 | pnp           | 2.62 |
| 225 | ATP-dependent protease ATPase subunit HslU                                     | Q2FZ28 | hslU          | 2.37 |
| 226 | GTP-binding protein TypA, putative                                             | Q2G1Y6 | SAOUHSC_01058 | 2.25 |
| 227 | Adenylosuccinate lyase                                                         | Q2G2S0 | purB          | 2.25 |
| 228 | Fumarate hydratase class II                                                    | Q2FX94 | fumC          | 2.16 |
| 229 | Uncharacterized protein                                                        | Q2FVQ0 | SAOUHSC_02652 | 2.16 |
| 230 | Uncharacterized protein                                                        | Q2G146 | SAOUHSC_00309 | 1.94 |
| 231 | S-adenosylmethionine synthase                                                  | Q2G1W4 | metK          | 1.93 |
| 232 | D-alanine aminotransferase                                                     | Q2FXI0 | SAOUHSC_01867 | 1.74 |
| 233 | D-lactate dehydrogenase, putative                                              | Q2FV62 | SAOUHSC_02875 | 1.69 |
| 234 | Phosphopantothenoylcysteine decarboxylase/phosphopantothenate--cysteine ligase | Q2G268 | SAOUHSC_01178 | 1.54 |
| 235 | Uncharacterized protein                                                        | Q2FYJ0 | SAOUHSC_01455 | 1.50 |
| 236 | DNA polymerase                                                                 | Q2FXN9 | SAOUHSC_01797 | 1.41 |
| 237 | Transcription-repair-coupling factor                                           | Q2G0R8 | mfd           | 1.41 |
| 238 | Uncharacterized protein                                                        | Q2FXX4 | SAOUHSC_01706 | 1.41 |
| 239 | NADP-dependent malic enzyme, putative                                          | Q2FXM5 | SAOUHSC_01810 | 1.31 |
| 240 | UDP-N-acetylmuramyl tripeptide synthetase, putative                            | Q2FWZ9 | SAOUHSC_02107 | 1.23 |
| 241 | Threonine--tRNA ligase                                                         | Q2FXP7 | thrS          | 0.89 |
| 242 | DNA ligase                                                                     | Q2G1Y0 | ligA          | 0.72 |
| 243 | Protein translocase subunit SecA 2                                             | Q2FUW6 | secA2         | 0.64 |

<sup>a)</sup> The proteins are ordered from the highest to lowest APEX score. APEX normalization factor = 100,000.

## Supplementary Methods

**IL-8 assay.** HEK293 cells were transfected either with pDUO-mock or pDUO-human TLR4/MD2 (Invivogen) according to the manufacturer's instruction<sup>1</sup>. The transfected cells were seeded on a 24-well plate ( $1 \times 10^5$  cells/well). Various concentrations of *E. coli* wild-type or  $\Delta msbB$  OMVs (0, 10, 100, or 1000 ng/ml) were treated to the cells with 0.5% FBS, and the culture supernatants were harvested at 6 h after treatment. The concentration of IL-8 was measured in the culture supernatants by DuoSet ELISA kit (R&D Systems).

***S. aureus* wildtype extracellular vesicle targeting *in vivo*.** *S. aureus* wildtype extracellular vesicles were labeled with Cy7 mono NHS ester (Amersham Biosciences) by 2 h incubation at 37 °C. Excess Cy7 was removed using ultracentrifugation at 150,000g for 3 h at 4°C. Cy7-labeled extracellular vesicles (10 µg in total protein) were injected intravenously to normal mice and mice bearing tumor with a diameter of 15 mm (male, 8 weeks old). Mice were anesthetized and shaved before the intravenous injection of Cy7-labeled OMVs. Cy7 signals were measured using the IVIS spectrum (Caliper Life Sciences), 12 h after the injection.

**IFN- $\gamma$  neutralization.** For IFN- $\gamma$  neutralization, 200 µg of mouse monoclonal anti-IFN- $\gamma$  IgG1 (Bio X Cell, BE0055) was intraperitoneally injected 24 h before each OMV injection. Control group was intraperitoneally injected with 200 µg of isotype IgG<sub>1</sub> antibody (Bio X Cell, BE0290) 24 h before each OMV injection.

### **Quantification of IFN- $\gamma$ after heated and trypsin-treated extracellular vesicles injection.**

To prepare heated bacterial extracellular vesicles, *E. coli*  $\Delta msbB$  OMVs and *S. aureus* WT extracellular vesicles were boiled at 100°C for 10 min. For trypsin treatment, *E. coli*  $\Delta msbB$  OMVs and *S. aureus* WT extracellular vesicles were treated with trypsin (Promega) at 37°C

for 1 h and was added with trypsin inhibitor cocktail and excess buffer. The trypsin-treated extracellular vesicles were collected by ultracentrifugation at 150,000g for 2 h at 4°C. Then, the extracellular vesicle samples were intravenously injected to mice bearing tumors with a diameter of around 15 mm and serum were collected after 6 h and tumor tissues were collected after 48 h for IFN- $\gamma$  measurement.

**Proteomic analysis on extracellular vesicles.** To identify the proteomes of extracellular vesicles derived from *E. coli* W3110  $\Delta$ *msbB* and wildtype *S. aureus*, in-solution digestion was performed with filter-aided sample preparation<sup>2</sup>. The vesicular proteins (50  $\mu$ g) were solubilized in lysis buffer (50 mM Tris-HCl (pH 7.5), 1% NP-40, 0.25% sodium deoxycholate, 100 mM sodium chloride, 1 mM EDTA, and protease inhibitor cocktail (Roche Applied Science) and then denatured with 6 M guanidine-HCl and reduced with 5 mM Tris (2-carboxyethyl) phosphine hydrochloride (Thermo Scientific) for 5 min at 95°C. The denatured proteins were alkylated with 50 mM iodoacetoamide for 30 min in the dark at room temperature. After alkylation, vesicular proteins were concentrated by methanol/chloroform precipitation<sup>3</sup>. Precipitated proteins were resuspended with 2 M urea in 50 mM NH<sub>4</sub>HCO<sub>3</sub> and digested with sequencing-grade modified trypsin (enzyme to protein ratio 1:100; Promega) for 16 h at 37°C. The tryptic peptides were loaded on Amicon Ultra 10K filters (Millipore) and collected by centrifugation at 14,000g for 20 min. The residual concentrates in the filter were additionally digested with trypsin (enzyme to protein ratio 1:100) in 50 mM NH<sub>4</sub>HCO<sub>3</sub> for 6 h at 37°C. Residual tryptic peptides were collected by centrifugation at 14,000g for 20 min at 4°C. Finally, the filters were rinsed with 500 mM sodium chloride and centrifuged at 14,000g for 20 min at 4°C. All eluents from the filters were collected and desalted with C18 column (Thermo Scientific) for mass spectrometry.

The desalted tryptic peptides were analyzed with an LTQ-Orbitrap Velos mass spectrometer (Thermo Finnigan) combined with EASY-nLC II (Thermo Finnigan). The tryptic peptides were separated using a lab-made microcapillary column (75  $\mu\text{m}$   $\times$  12 cm) packed with C18 resin with an average diameter of 5  $\mu\text{m}$  (Michrom Bioresources). The sample was separated using a linear 60 min gradient of a mixture of solvent A (0.1% formic acid in 2% acetonitrile) to 60% solvent B (0.1% formic acid in 98% acetonitrile) at a flow rate of 300 nL/min. The separated peptides were electrosprayed with the electrospray voltage of 2.6 kV. All MS/MS spectra were obtained in data-dependent scans for fragmentation of the ten most abundant spectra from full scans. We used the following dynamic exclusion conditions to increase the size of proteome to be detected: dynamic exclusion duration = 180 sec, exclusion mass width = 1.5 Da, repeat count for dynamic exclusion = 1, repeat duration = 30 sec, and the list size of dynamic exclusion = 50.

Five and nine technical replicates of LC-MS/MS data of *E. coli*  $\Delta\text{msbB}$  OMVs and *S. aureus* extracellular vesicles were analysed using X!Tandem with Trans-Proteomic Pipeline (version 4.8.0)<sup>4</sup>, respectively. Using MSConverter, RAW files were converted into mzXML files. The mzXML files from mass spectrometry of extracellular vesicles derived from *E. coli* and *S. aureus* were searched in the reference proteome databases of *E. coli* (strain K-12; 4,307 entries) and *S. aureus* database (strain NCTC8325; 2,889 entries) from UniProt database (release 2017\_04), respectively, using X!Tandem. To check contamination from the culture media, which contain yeast extracts and tryptone (peptides formed by the digestion of casein by trypsin), the mzXML files were also search in the reference proteomes of yeast (*Saccharomyces cerevisiae* strain ATCC 204508; 6,721 entries) and cow (*Bos taurus*; 24,148 entries). Tolerance was set to 10 ppm and 0.8 Da for precursor ions and fragment ions,

respectively. Enzyme specificity was set to trypsin, and the number of missed cleavage sites was set to two. Four variable modification options were used: carbamidomethylation of cysteine (+57.021 Da), deamination of N-terminal glutamine (-17.027 Da), dehydration of N-terminal glutamic acid (-18.011 Da), and oxidation of methionine (+15.995 Da). Trans-Proteomic Pipeline was employed to statistically identify peptides by PeptideProphet (PeptideProphet  $\geq$  0.9) and proteins by ProteinProphet (ProteinProphet  $\geq$  0.9). The relative abundance of each vesicular protein was quantitated by absolute protein expression (APEX; version 1.1.0)<sup>5</sup>. To generate an experiment-specific dataset, a training dataset was selected from the first 50 top-ranked proteins with high spectral counts from ProteinProphet results. APEX normalization factor was set to 100,000, and the relative abundance of each vesicular protein was quantitated as previously reported<sup>5</sup>.

Subcellular localizations of vesicular proteins were acquired from UniProt (release 2017\_04)<sup>6,7</sup>, DAVID<sup>8,9</sup>, and LocateP<sup>10</sup> databases. The statistical significance between cellular and extracellular vesicle proteomes was calculated using Fisher's exact test<sup>11</sup>.



## Supplementary References

- 1 Pugin, J. *et al.* Soluble MD-2 activity in plasma from patients with severe sepsis and septic shock. *Blood* **104**, 4071-4079, doi: 10.1182/blood-2003-04-1290 (2004).
- 2 Wisniewski JR, Zougman A, Nagaraj N, Mann M. Universal sample preparation method for proteome analysis. *Nat Methods* **6**, 359-362 (2009).
- 3 Wessel D, Flugge UI. A method for the quantitative recovery of protein in dilute solution in the presence of detergents and lipids. *Anal Biochem* **138**, 141-143 (1984).
- 4 Keller A, Eng J, Zhang N, Li XJ, Aebersold R. A uniform proteomics MS/MS analysis platform utilizing open XML file formats. *Mol Syst Biol* **1**, 2005 0017 (2005).
- 5 Braisted JC, *et al.* The APEX Quantitative Proteomics Tool: generating protein quantitation estimates from LC-MS/MS proteomics results. *BMC Bioinformatics* **9**, 529 (2008).
- 6 Apweiler R, *et al.* UniProt: the Universal Protein knowledgebase. *Nucleic Acids Res* **32**, D115-119 (2004).
- 7 UniProt C. Activities at the Universal Protein Resource (UniProt). *Nucleic Acids Res* **42**, D191-198 (2014).
- 8 Huang da W, Sherman BT, Lempicki RA. Bioinformatics enrichment tools: paths toward the comprehensive functional analysis of large gene lists. *Nucleic Acids Res* **37**, 1-13 (2009).
- 9 Huang da W, Sherman BT, Lempicki RA. Systematic and integrative analysis of large gene lists using DAVID bioinformatics resources. *Nat Protoc* **4**, 44-57 (2009).
- 10 Zhou M, Boekhorst J, Francke C, Siezen RJ. LocateP: genome-scale subcellular-location predictor for bacterial proteins. *BMC Bioinformatics* **9**, 173 (2008).
- 11 Fisher RA. *Statistical methods for research workers* (1954).
